# Supplementary material for: MetaGen: reference-free learning with multiple metagenomic samples
Source: PubMed Central journal article supplement (PMC5627425; doi:10.1186/s13059-017-1323-y), 2017-10-03
Supplement: 13059_2017_1323_MOESM1_ESM.pdf [file 13059_2017_1323_MOESM1_ESM.pdf]

# Additional File 1

## Supporting Information

### Reference-free Learning with Multiple Metagenomic Samples

#### 1 Simulated Data Sets

In our simulation studies, we generated reads using MetaSim [1] with Illumina 80-bp paired-end reads error model. To model the high variation of the bacteria distribution across different samples, we simulated the relative abundances of species in each sample from a Dirichlet distribution. The 150 microbial species used in all simulation settings are listed in Table **S1**. MetaGen, MaxBin and CLARK are based on contigs longer than 1000bp. MetaBAT is based on contigs longer than 1500bp, which is the algorithm’s minimum length cut-off. In simulation settings 1-3, we considered the sequencing depth, the number of samples, and the number of species as three variables. In each setting, we fixed two variables and change the other one.

##### **Simulation Settings 1-3:**

In the first setting, we fixed the number of samples at 80 and the number of specie at 100, and changed the pooled sequencing depth as 80x, 120x and 160x, which is equivalent to 1x, 1.5x and 2x per sample. In the second setting, we fixed the pooled sequencing depth at 120x and the number of species at 100, and changed the number of sample as “20”, “40” and “80”. In the third setting, we fixed the pooled sequencing depth at 120x and the number of samples at 80, and changed the number of species as “50”, “100” and “150”. All the detailed binning results of MetaGen, CLARK, MaxBin, MetaBAT, and CONCOCT are shown in Figures **5** and **S2-S8**. The computing times are shown in Figure **S1**. The correlations between the estimated relative abundances and the true relative abundances is shown in Figure **6**.

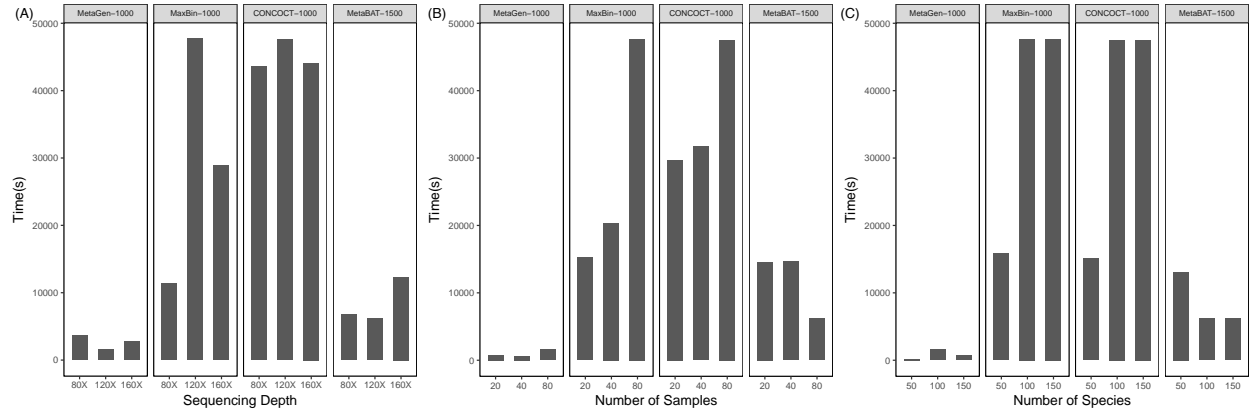

**Figure S1:** Computing times for MetaGen, MaxBin, CONCOCT and MetaBAT under different sequencing depths, different numbers of samples and different numbers of species.

### 80x-80sample-100species

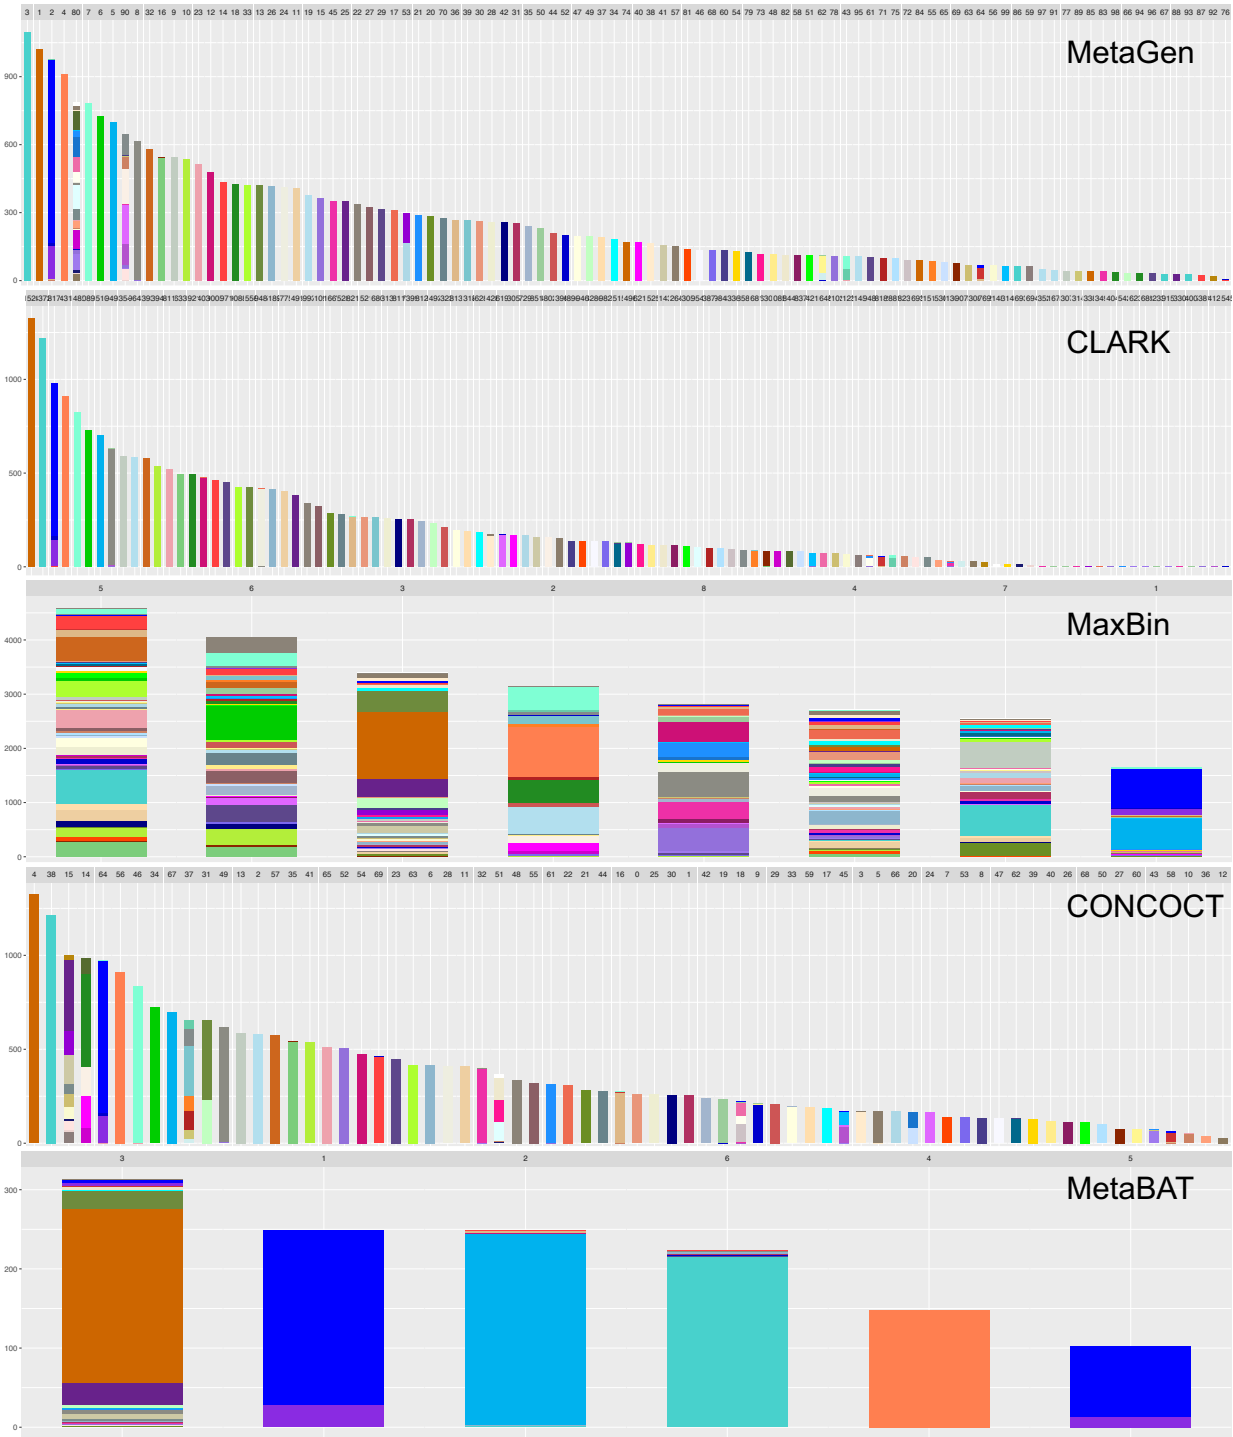

**Figure S2:** Binning results for MetaGen, CLARK, MaxBin, CONCOCT and MetaBAT with the pooled sequencing depth fixed at 80x, the number of samples at 80 and the number of species at 100. Color legends are given in **Figure S9**.

### 120x-80sample-100species

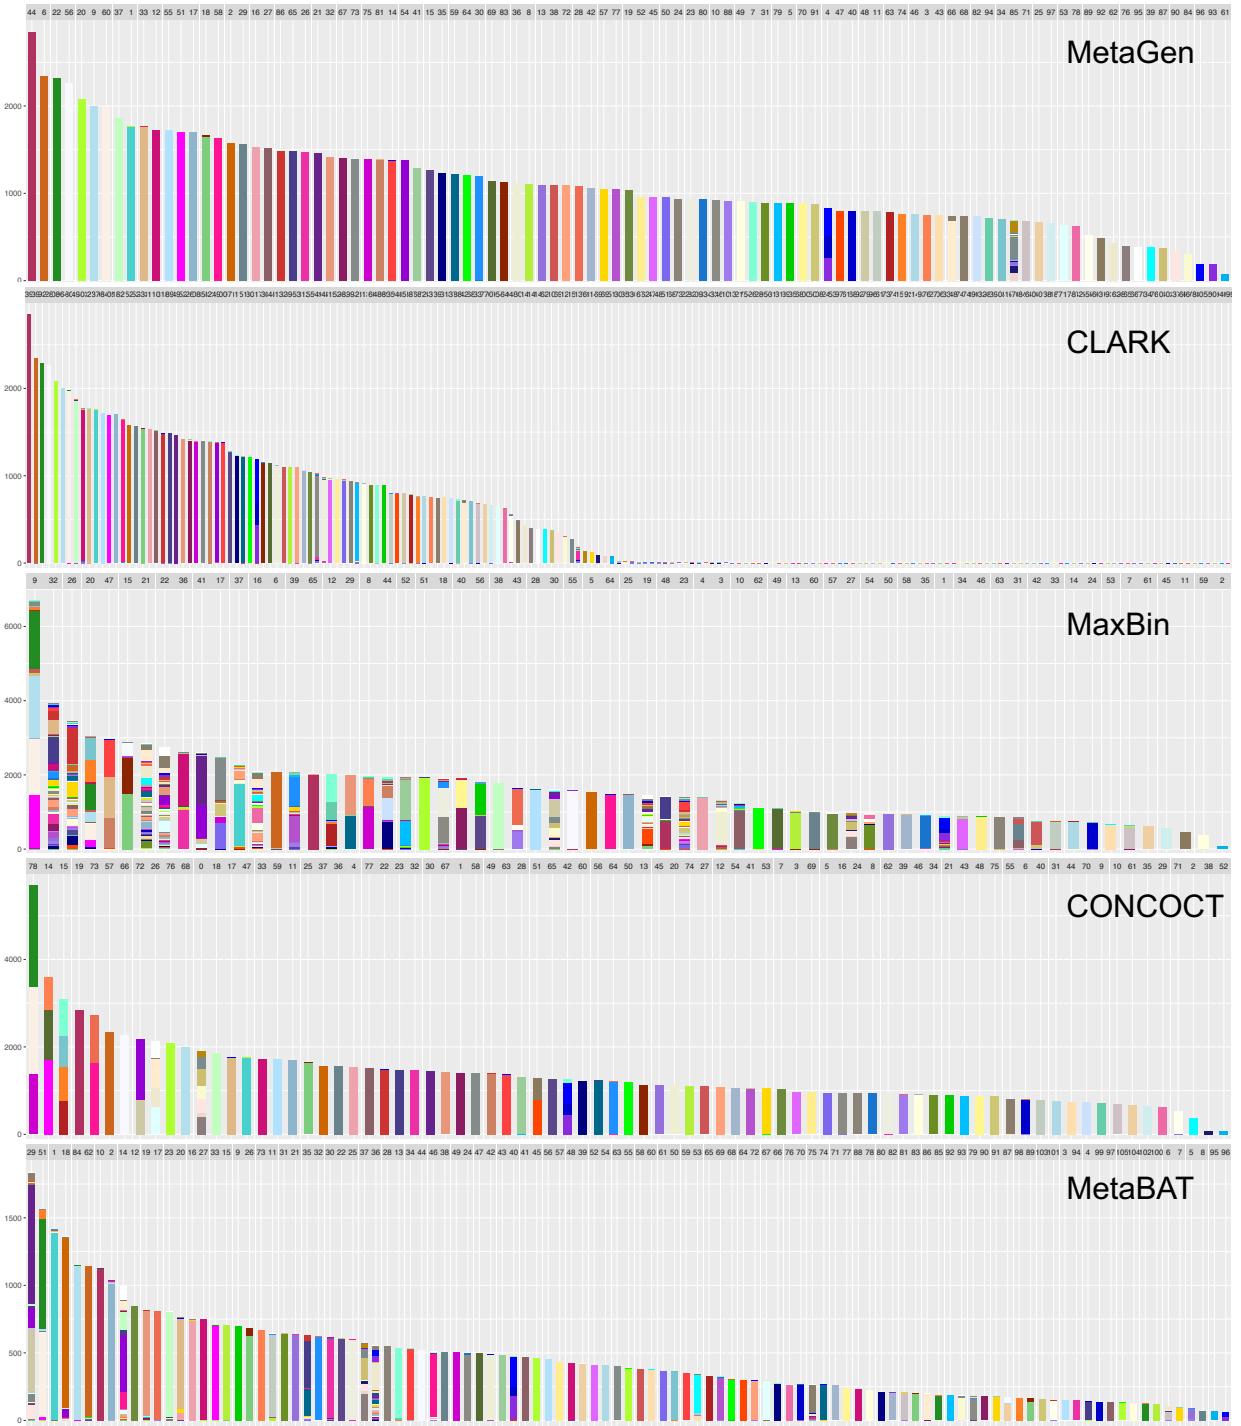

**Figure S3:** Binning results for MetaGen, CLARK, MaxBin, CONCOCT and MetaBAT with the pooled sequencing depth at 120x, the number of samples at 80, and the number of species at 100. Color legends are given in **Figure S9**.

# 160x-80sample-100species

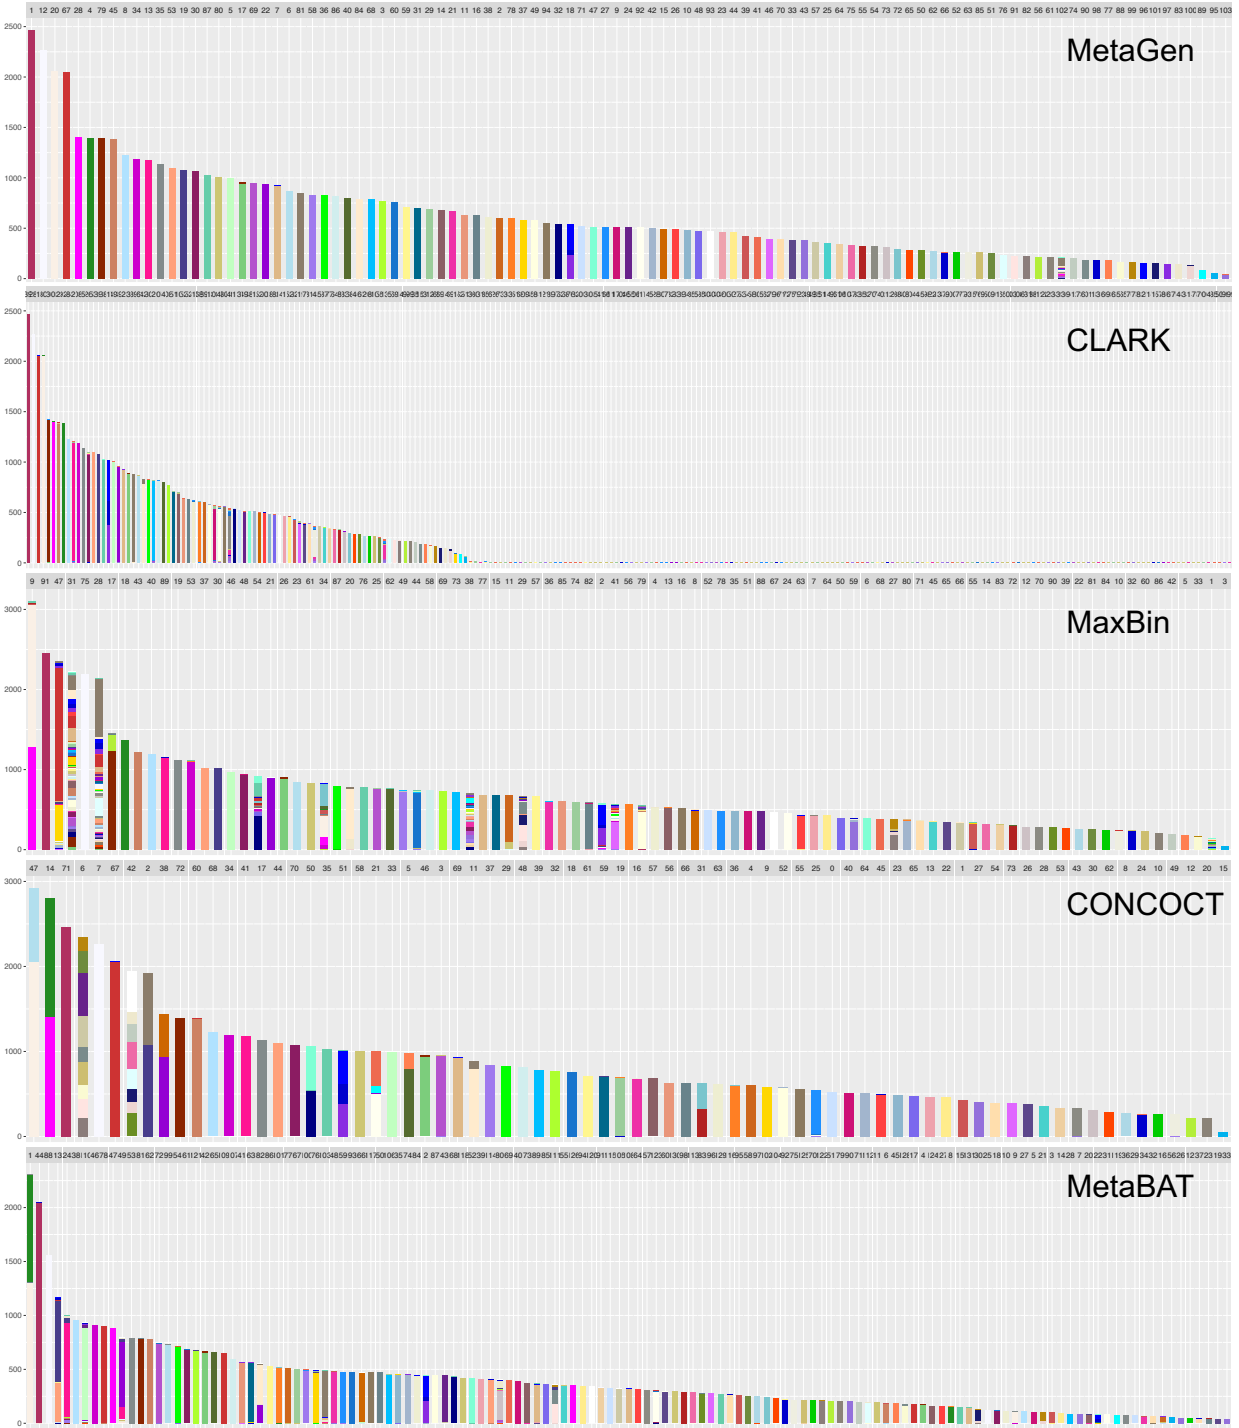

**Figure S4:** Binning results for MetaGen, CLARK, MaxBin, CONCOCT, and MetaBAT with the pooled sequencing depth at 160x, the number of samples at 80, and the number of species at 100. Color legends are given in **Figure S9**.

### 120x-20sample-100species

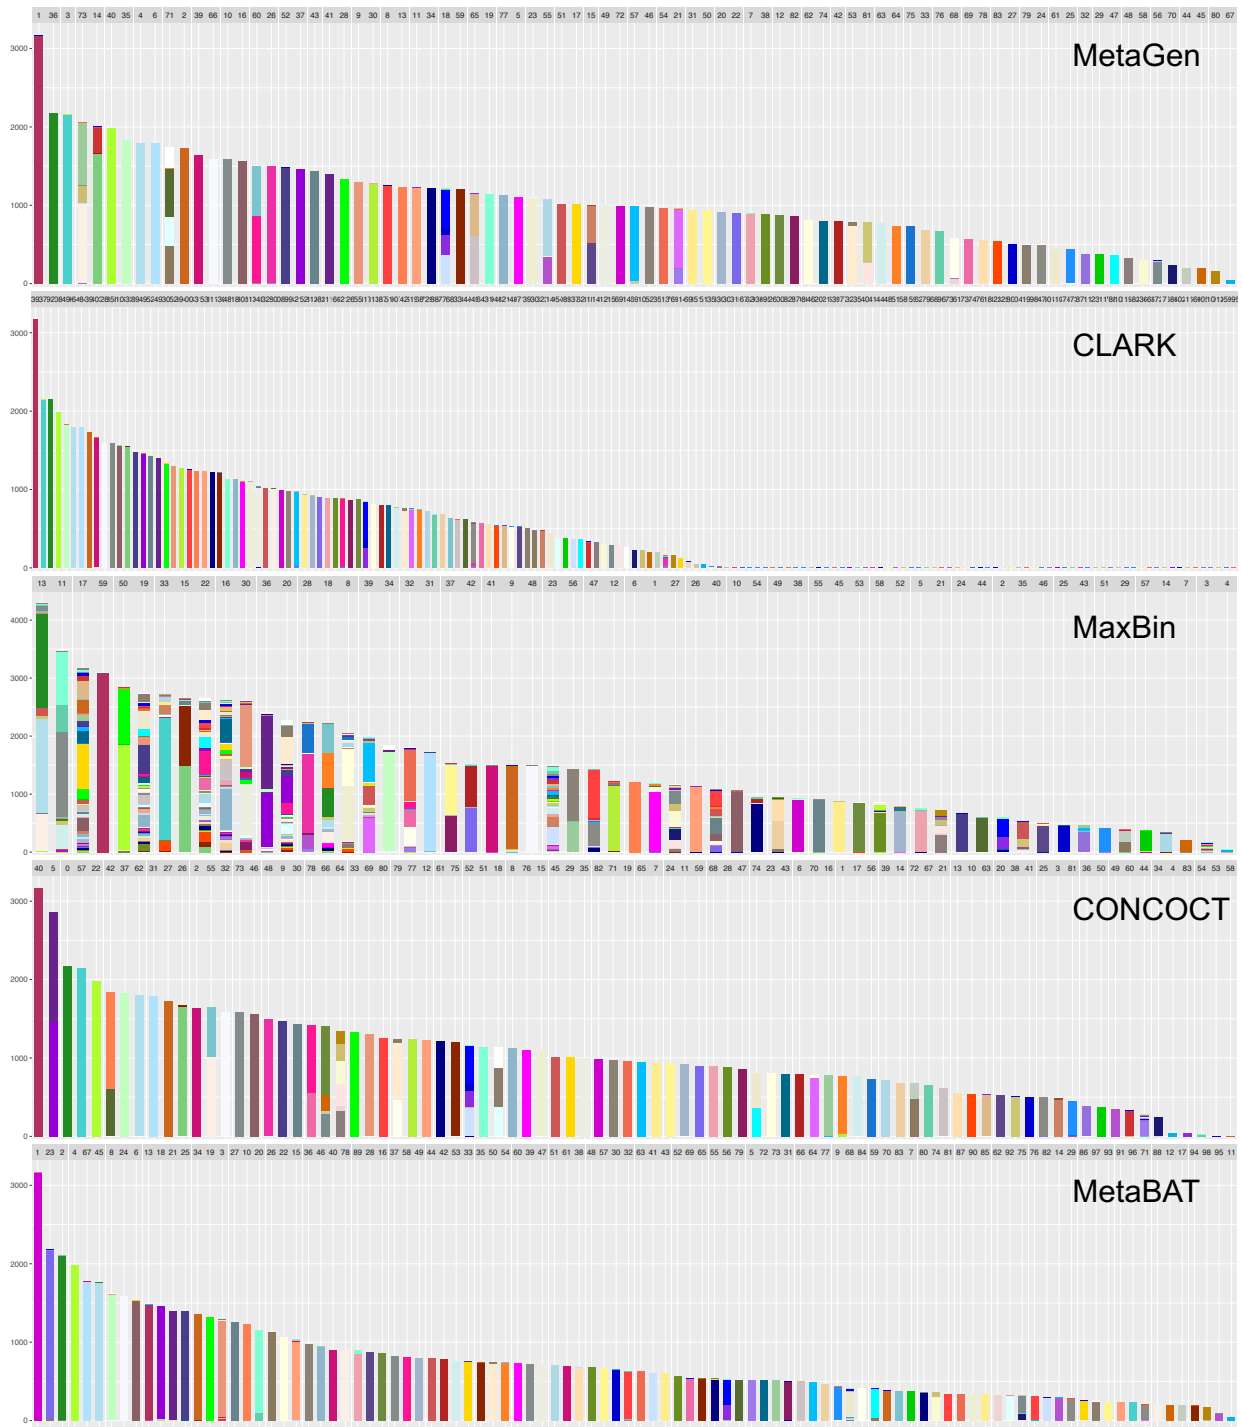

**Figure S5:** Binning results for MetaGen, CLARK, MaxBin, CONCOCT, and MetaBAT with the pooled sequencing depth at 120x, the number of samples at 20 and the number of species at 100. Color legends are given in **Figure S9**.

### 120x-40sample-100species

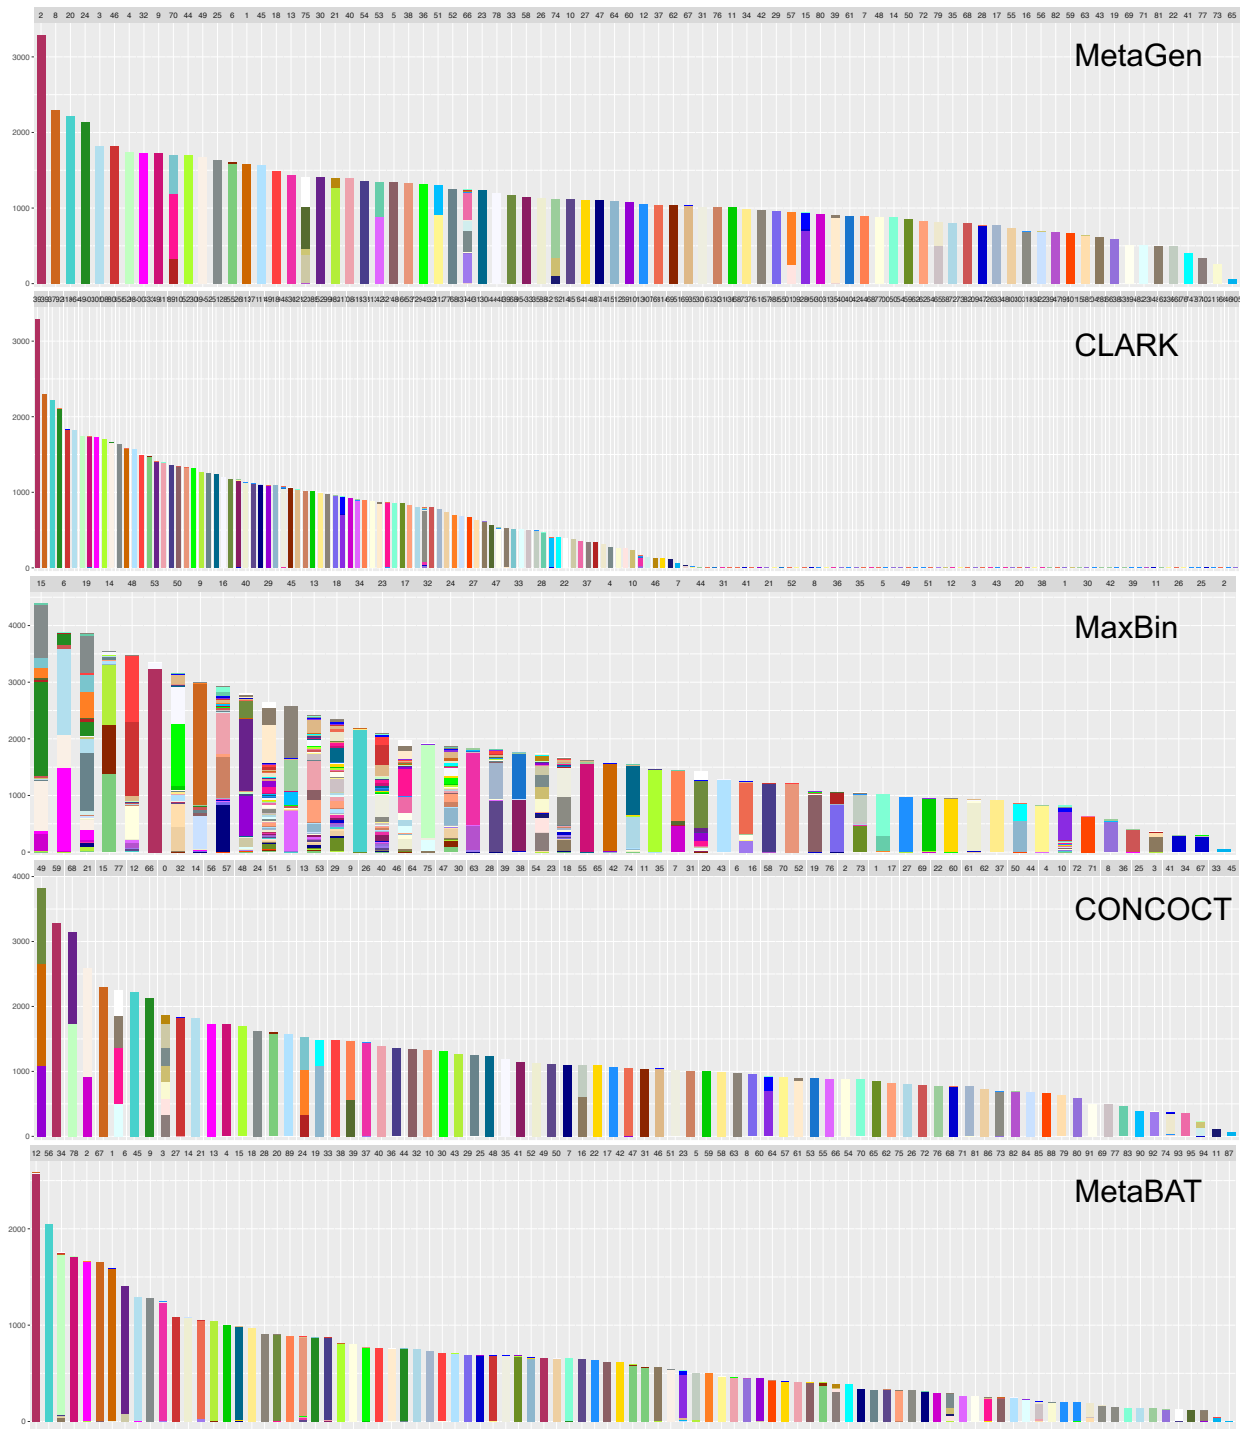

**Figure S6:** Binning results for MetaGen, CLARK, MaxBin, CONCOCT, and MetaBAT with the pooled sequencing depth at 120x, the number of samples at 40, and the number of species at 100. Color legends are given in **Figure S9**.

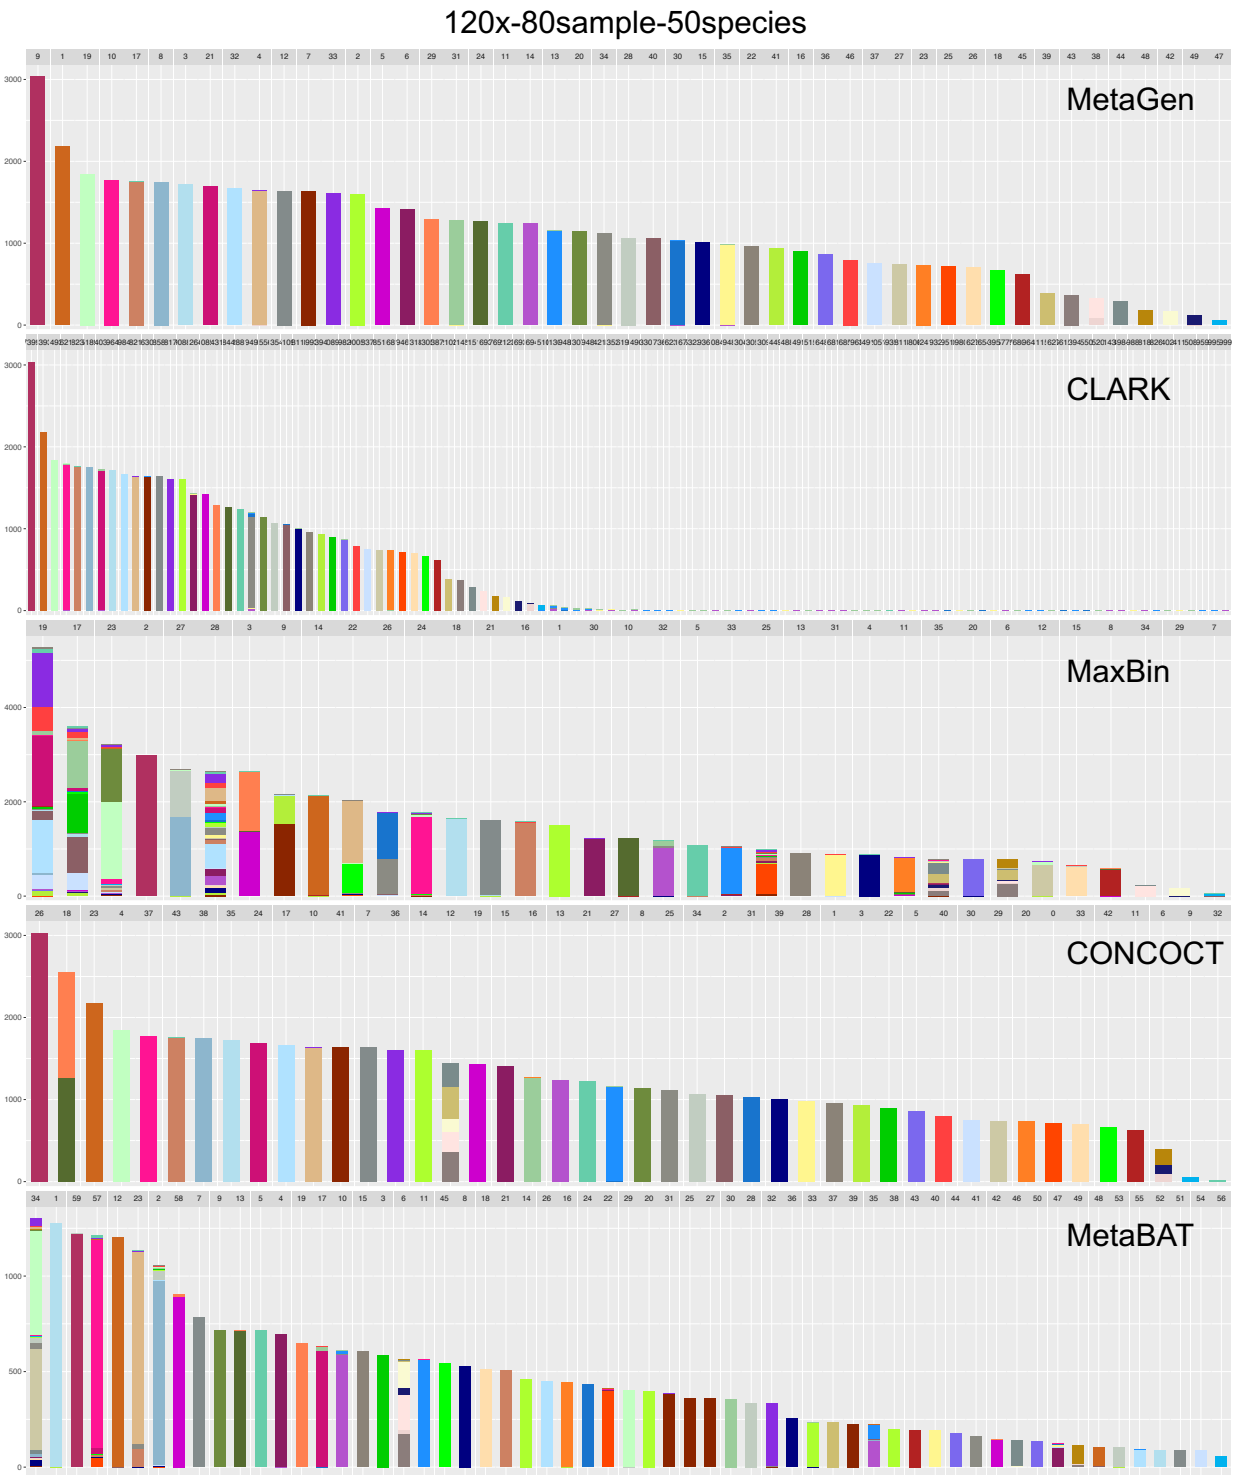

**Figure S7:** Binning results for MetaGen, CLARK, MaxBin, CONCOCT, and MetaBAT with the pooled sequencing depth at 120x, the number of samples at 80, and the number of species at 50. Color legends are given in **Figure S9**.



# 120x-80sample-150species

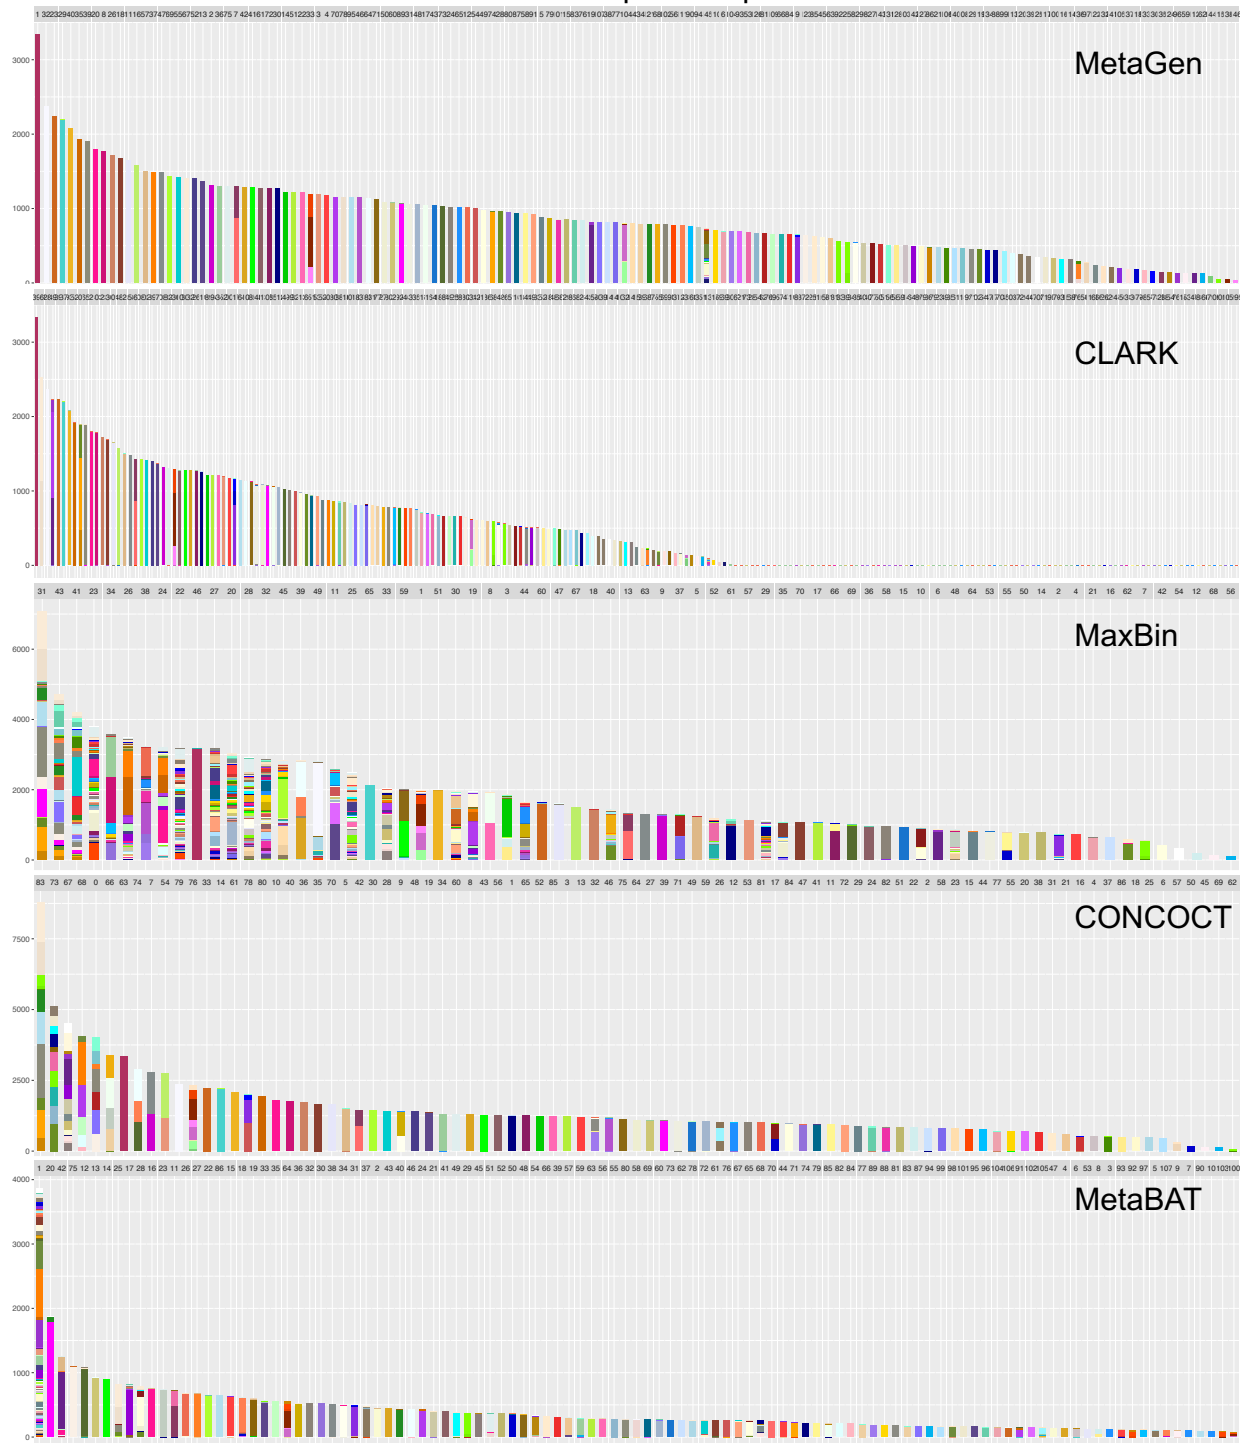

**Figure S8:** Binning results for MetaGen, CLARK, MaxBin, CONCOCT, and MetaBAT with the pooled sequencing depth at 120x, the number of samples at 80, and the number of species at 150. Color legends are given in **Figure S9**.

|                                         |                                               |                                          |                                       |                                                      |
|-----------------------------------------|-----------------------------------------------|------------------------------------------|---------------------------------------|------------------------------------------------------|
| Acholeplasma laidlawii PG-8A            | Butyrivibrio proteoclasticus B316             | Coprococcus sp. ART55/1                  | Flavobacteriaceae bacterium 3519-10   | Ruminococcus albus 7                                 |
| Achromobacter xylosoxidans A8           | Candidatus Arthromitus sp.                    | Coriobacterium glomerans PW2             | Fusobacterium nucleatum subsp.        | Ruminococcus bromii L2-63                            |
| Achromobacter xylosoxidans NH44784-1996 | Candidatus Azobacteroides pseudotrichonymphae | Corynebacterium argentoratense DSM       | Haemophilus parainfluenzae T3T1       | Ruminococcus champanellensis 18P13                   |
| Akkermansia muciniphila ATCC            | Candidatus Chloracidobacterium thermophilum   | Cryptobacterium curtum DSM               | Herbaspirillum seropedicae SmR1       | Ruminococcus obeum A2-162                            |
| Alistipes finegoldii DSM                | Candidatus Liberibacter solanacearum          | Cupriavidus metallururgans CH34          | Janthinobacterium sp. Marseille       | Ruminococcus sp. SR1/5                               |
| Alistipes shahii WAL                    | Candidatus Nitrospira defluvi                 | Cylinndrospermum stagnale PCC            | Lawsonia intracellulularis PHE/MN1-00 | Ruminococcus torques L2-14                           |
| Alkalimnicola ehrlichii MLHE-1          | Candidatus Pelagibacter sp.                   | Dehalobacter sp. CF                      | Megasphaera elsdenii DSM              | Selenomonas ruminantium subsp.                       |
| Alkaliphilus metalliredigens QYMF       | Candidatus Phytoplasma mali                   | Denitrovibrio acetophilus DSM            | Mesoplasma florum L1                  | Selenomonas sputigena ATCC                           |
| Asticcacaulis excentricus CB            | Candidatus Protochlamydia amoebophila         | Desulfarculus baarsii DSM                | Moorella thermoacetica ATCC           | Sphingobacterium sp. 21                              |
| Bacillus amyloliquefaciens XH7          | Candidatus Rickettsia amblyommii              | Desulfatibacillum aikenivorans AK-01     | Mycoplasma mycoides subsp.            | Spiroplasma chrysopicola DF-1                        |
| Bacillus amyloliquefaciens Y2           | Capnocytophaga canimorsus Cc5                 | Desulfotobacterium dehalogenans ATCC     | Mycoplasma putrefaciens Mput9231      | Spiroplasma diminutum CUAS-1                         |
| Bacillus cereus E33L                    | Clavibacter michiganensis subsp.              | Desulfotobacterium dichloroeliminans LMG | Mycoplasma suis K13806                | Spiroplasma syphidicola EA-1                         |
| Bacillus thuringiensis serovar          | Clostridium acetobutylicum EA                 | Desulfobacca acetoxidans DSM             | Odoribacter splanchnicus DSM          | Spiroplasma taiwanense CT-1                          |
| Bacteroides fragilis 638R               | Clostridium acidurici 9a                      | Echinicola vietnamensis DSM              | Oscillibacter valericigenes Sjm18-20  | Streptococcus parasanguinis FW213                    |
| Bacteroides fragilis NCTC               | Clostridium autoethanogenum DSM               | Enterococcus faecium Aus0085             | Paludibacter propionicigenes WB4      | Streptococcus pseudopneumoniae IS7493                |
| Bacteroides fragilis YCH46              | Clostridium beijerinckii NCIMB                | Enterococcus hirae ATCC                  | Parabacteroides distans ATCC          | Streptococcus thermophilus ND03                      |
| Bacteroides helcogenes P                | Clostridium botulinum A                       | Enterococcus mundtii QU                  | Pedococcus pentosaceus SL4            | Tannerella forsythia ATCC                            |
| Bacteroides thetaiotaomicron VPI-5482   | Clostridium botulinum B                       | Erysipelothrix rhusiopathiae SY1027      | Pedobacter heparinus DSM              | Tetragenococcus halophilus NBRC                      |
| Bacteroides vulgatus ATCC               | Clostridium botulinum H04402                  | Escherichia coli LF82                    | Pedobacter saltans DSM                | Tolomonas auensis DSM                                |
| Bartonella australis Aust/NH1           | Clostridium cellulolyticum H10                | Escherichia coli NA114                   | Pelagibacterium halotolerans B2       | Variovorax paradoxus B4                              |
| Bartonella bacilliformis KCS83          | Clostridium cellulovorans 743B                | Ethanoligenens harbinense YUAN-3         | Porphyromonas gingivalis ATCC         | Variovorax paradoxus EPS                             |
| Bartonella clarridgeiae 73              | Clostridium cf. saccharolyticum               | Eubacterium cylindroides T2-87           | Prevotella denticola F0289            | Variovorax paradoxus S110                            |
| Bifidobacterium adolescentis ATCC       | Clostridium clariflavum DSM                   | Eubacterium eligens ATCC                 | Prevotella intermedia 17              | Veillonella parvula DSM                              |
| Bifidobacterium bifidum BGN4            | Clostridium difficile R20291                  | Eubacterium rectale ATCC                 | Prevotella melaninogenica ATCC        | Yersinia enterocolitica subsp. enterocolitica 8081   |
| Bifidobacterium bifidum PRL2010         | Clostridium phytofermentans ISDg              | Eubacterium siraeum V10Sc8a              | Ralstonia eutropha H16                | Yersinia enterocolitica subsp. palearctica 105.5R(r) |
| Bifidobacterium breve UCC2003           | Clostridium saccharolyticum WM1               | Faecalibacterium prausnitzii L2-6        | Ralstonia eutropha JMP134             | Yersinia enterocolitica subsp. palearctica Y11       |
| Bifidobacterium longum DJO10A           | Clostridium sp. SY8519                        | Ferrimonas balearica DSM                 | Ralstonia solanacearum CMR15          | Yersinia pestis A1122                                |
| Brevibacillus brevis NBRC               | Clostridium stercorarium subsp.               | Fibrobacter succinogenes subsp.          | Rhodospirillum rubrum F11             | Yersinia pestis Angola                               |
| Brevundimonas subvibrioides ATCC        | Clostridium thermocellum DSM                  | Filifactor alocis ATCC                   | Rivularia sp. PCC                     | Yersinia pestis Antiqua                              |
| Butyrate-producing bacterium SSC/2      | Coprococcus catus GD/7                        | Finexgoldia magna ATCC                   | Roseburia intestinalis XB6B4          | Yersinia pseudotuberculosis IP                       |

Figure S9: Color codes for all the 150 species used in Figures S1-S8.

### Simulation Setting 4:

In this simulation setting, we first simulated a metagenomic community including 54 strains of *E. coli* (listed in Table S2). We generated 40 samples each with 2 million pair-end reads using MetaSim [1] with Illumina 80-bp paired-end reads error model.

Second, we simulated a 100x coverage of 100-bp paired-end Illumina reads of 6 *ecoli* strains (see Table S2) by ART simulator [2] with default settings for Illumina and library settings as -m 350 -s 50. These samples were further grouped together to simulate 6 samples using the relative abundance provided in (supplementary Table 1 in [3].)

### Simulation Setting 5:

In this simulation study, we generated reads using MetaSim [1] with Illumina 80-bp paired-end reads error model. we generated 10 samples each with 25 million reads. To model the high variation of the bacteria distribution across different samples, the relative abundance of species in each sample was based on the 10 randomly selected real samples in our real examples. The histogram of the log-transformed relative abundance is shown in Figure S10. The 545 microbial species used in this simulation setting are listed in Table S3.

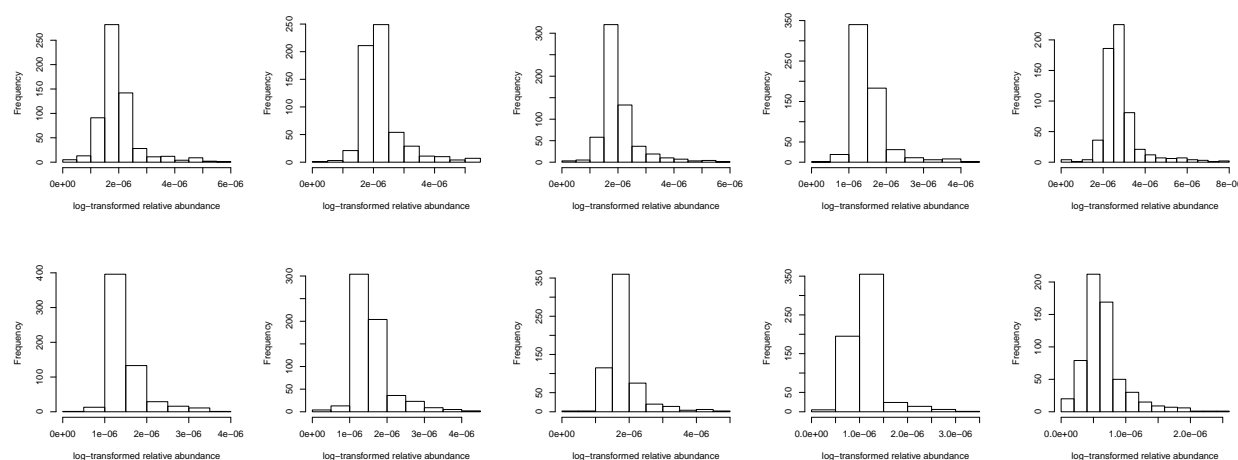

**Figure S10:** Histogram of the log-transformed relative abundance of different species for the 10 samples for the complex metagenomic data sets with 545 genomes and corresponding 439 circular elements.

### Simulation Setting 6:

We fixed the pooled sequencing depth at 120x, the number of samples at 80, and the number of specie at 100, and changed the proportion of species in each sample from 50% to 100%. Performances of MetaGen, CLARK, MaxBin, MetaBAT and CONCOCT are shown in Figure S11. The detailed binning results of MetaGen, CLARK, MaxBin, MetaBAT, and CONCOCT are shown in

Figures S12, S13, 5.

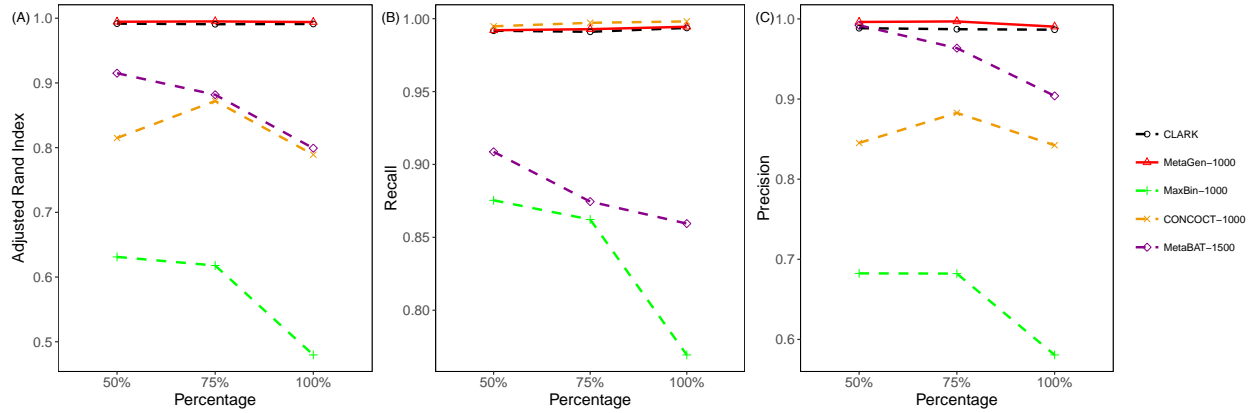

**Figure S11:** Adjusted Rand Index (A), Precision (B), and Recall (C) of CLARK, MetaGen, MaxBin, CONCOCT, and MetaBAT are evaluated on the simulated data sets with 50%, 75%, and 100% species, respectively, in each sample. All the three simulated data sets have 80 samples, 100 species, and the sequencing depth of 120x.

# 120x-80sample-100species-50

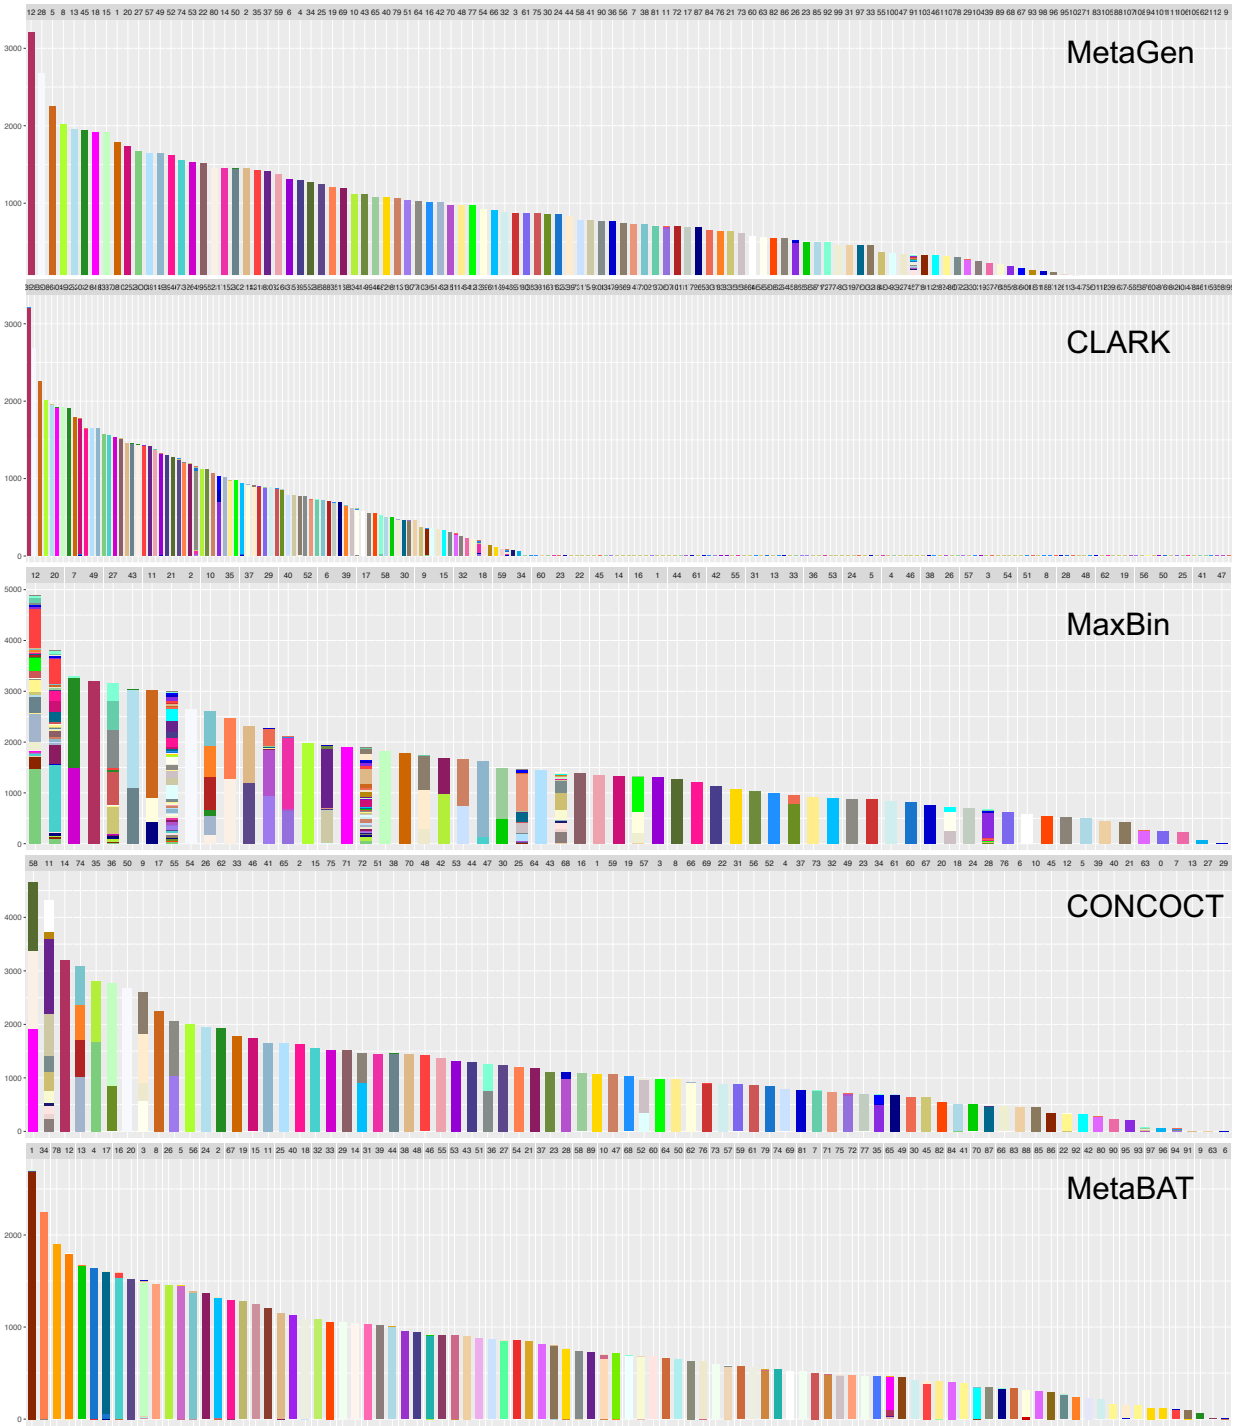

**Figure S12:** Binning results for MetaGen, CLARK, MaxBin, CONCOCT, and MetaBAT with the pooled sequencing depth at 120x, the number of samples at 80, and the number of species at 150, and with 50% of species in each sample. Color legends are given in **Figure S16**.

### 120x-80sample-100species-75

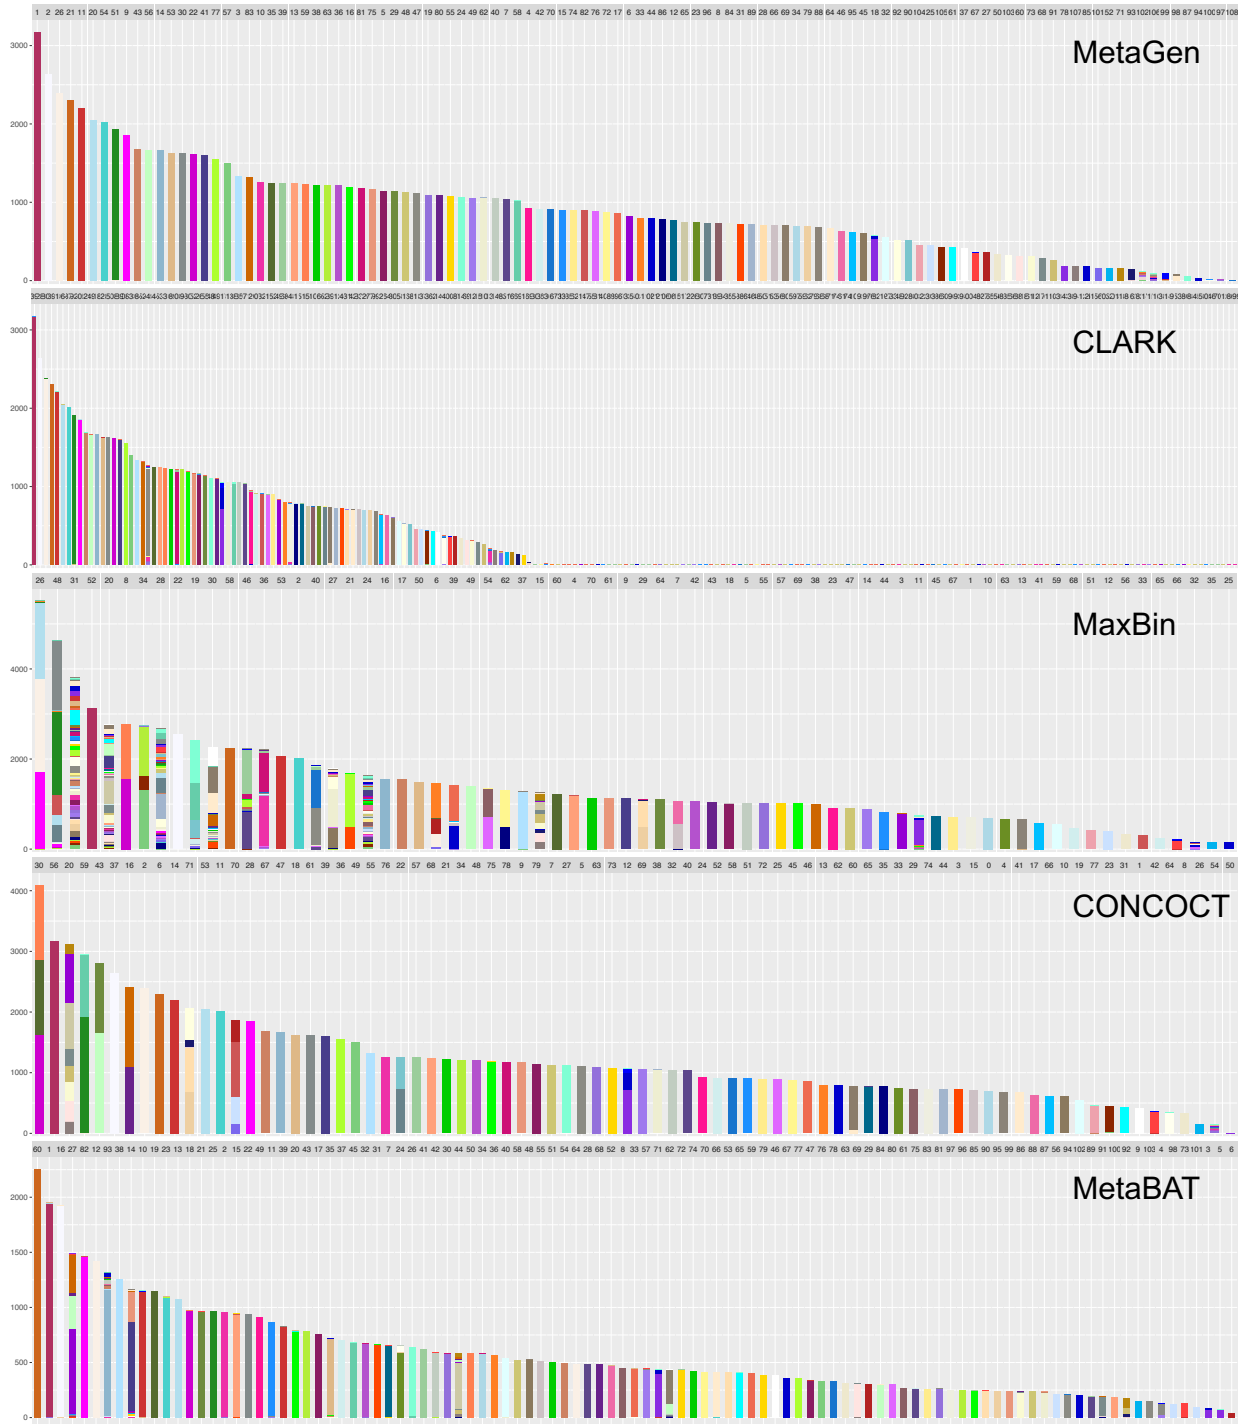

**Figure S13:** Binning results for MetaGen, CLARK, MaxBin, CONCOCT and MetaBAT with the pooled sequencing depth at 120x, the number of samples at 80, the number of species at 150, and with 75% of species in each sample. Color legends are given in **Figure S16**.

### Simulation Setting 7:

We fixed the pooled sequencing depth at 120x, the number of samples at 80, and the number of specie at 100, and used two different assemblers, MegaHIT and Ray. Performances of MetaGen, CLARK, MaxBin, MetaBAT and CONCOCT are shown in Figure S14. The detailed binning results of MetaGen, CLARK, MaxBin, MetaBAT and CONCOCT are shown in Figures S15, 5.

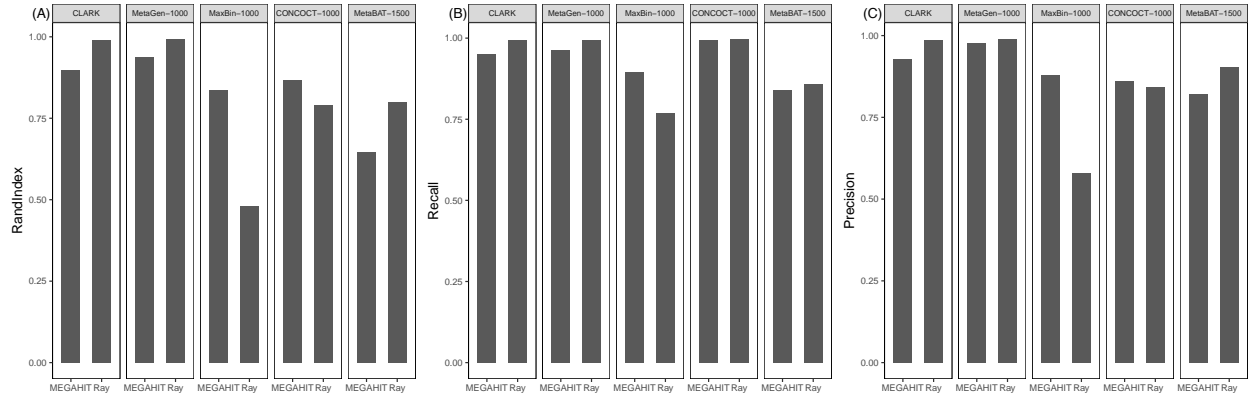

**Figure S14:** Adjusted Rand Index (A), Precision (B), and Recall (C) of CLARK, MetaGen, MaxBin, CONCOCT, and MetaBAT are evaluated using two different assemblers, MegaHIT and Ray. The simulated data sets have 80 samples, 100 species and the sequencing depth of 120x.

# 120x-80sample-100species-MegaHIT

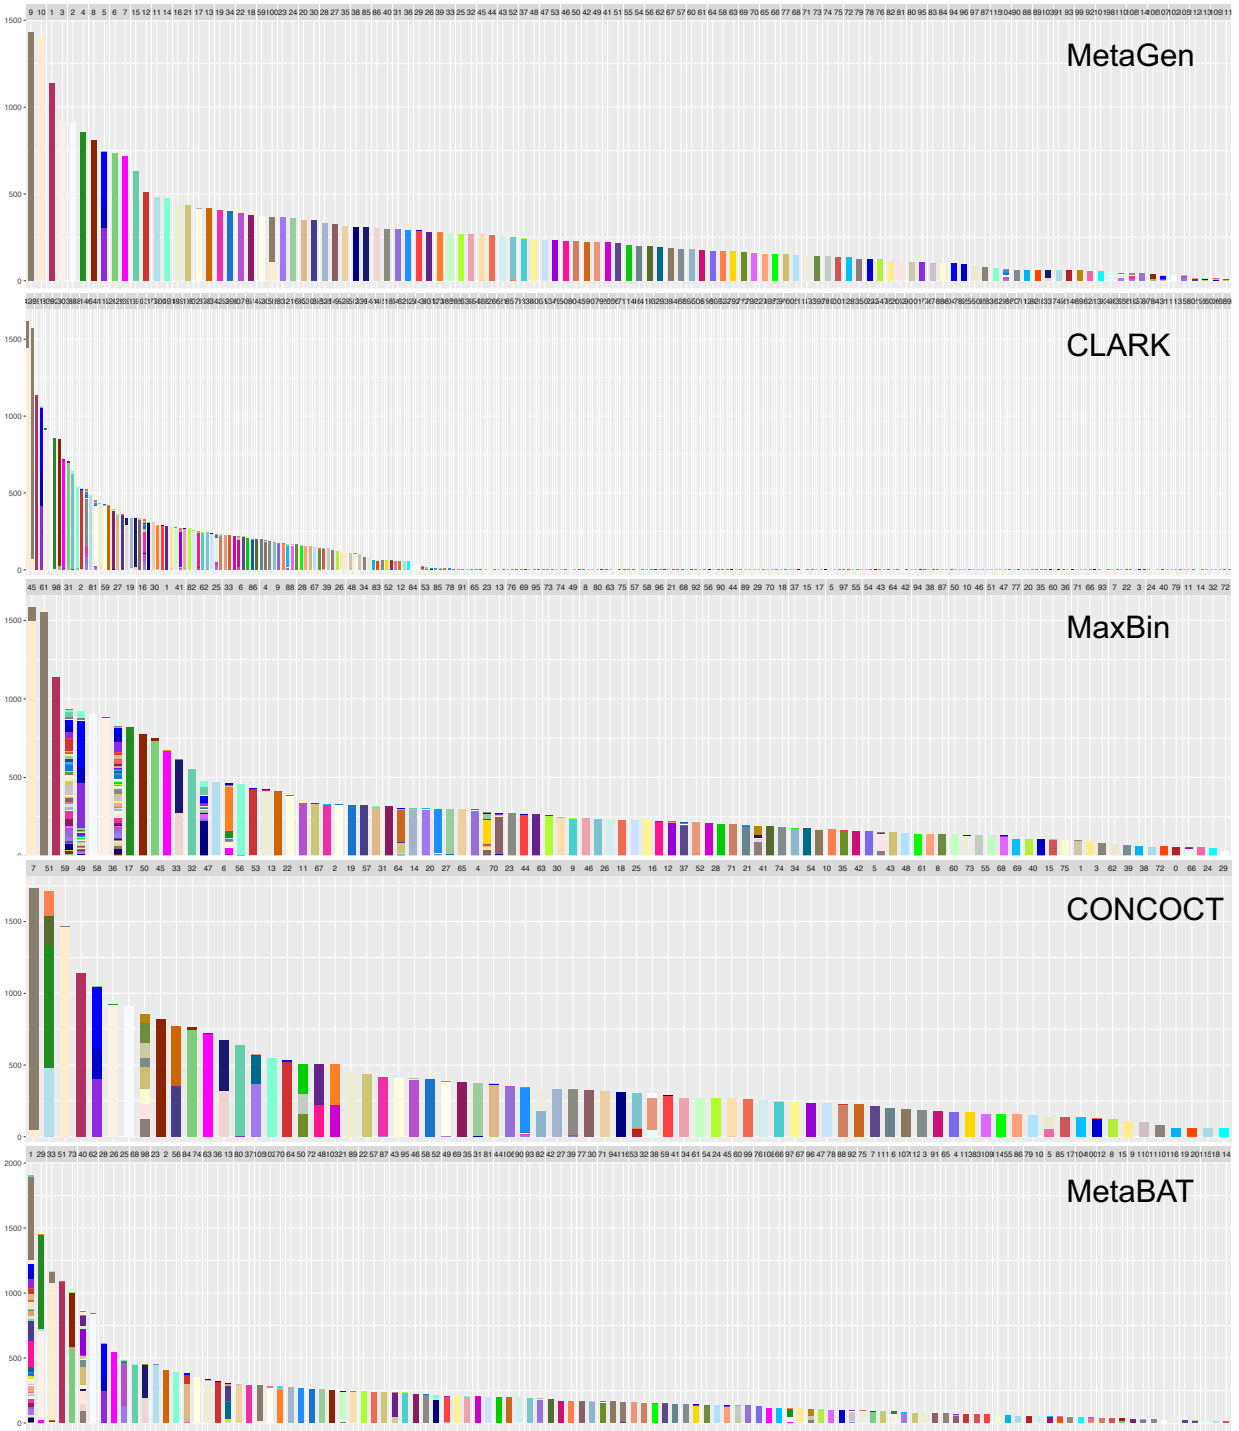

**Figure S15:** Binning results for MetaGen, CLARK, MaxBin, CONCOCT, and MetaBAT with the pooled sequencing depth at 120x, the number of samples at 80, and the number of species at 150, using the MegaHIT assembler. Color legends are given in **Figure S16**.



|                                         |                                               |                                          |                                      |                                                      |
|-----------------------------------------|-----------------------------------------------|------------------------------------------|--------------------------------------|------------------------------------------------------|
| Acholeplasma laidlawii PG-8A            | Butyrivibrio proteoclasticus B316             | Coprococcus sp. ART55/1                  | Flavobacteriaceae bacterium 3519-10  | Ruminococcus albus 7                                 |
| Achromobacter xylosoxidans A8           | Candidatus Arthromitus sp.                    | Coriobacterium glomerans PW2             | Fusobacterium nucleatum subsp.       | Ruminococcus bromii L2-63                            |
| Achromobacter xylosoxidans NH44784-1996 | Candidatus Azobacteroides pseudotrichonymphae | Corynebacterium argentoratense DSM       | Haemophilus parainfluenzae T3T1      | Ruminococcus champanellensis 18P13                   |
| Akkermansia muciniphila ATCC            | Candidatus Chloracidobacterium thermophilum   | Cryptobacterium curtum DSM               | Herbaspirillum seropedicae SmR1      | Ruminococcus obeum A2-162                            |
| Alistipes finegoldii DSM                | Candidatus Liberibacter solanacearum          | Cupriavidus metallurians CH34            | Janthinobacterium sp. Marseille      | Ruminococcus sp. SR1/5                               |
| Alistipes shahii WAL                    | Candidatus Nitrospira defluvi                 | Cylinndrospermum stagnale PCC            | Lawsonia intracellularis PHE/MN1-00  | Ruminococcus torques L2-14                           |
| Alkalimnicola ehrlichii MLHE-1          | Candidatus Pelagibacter sp.                   | Dehalobacter sp. CF                      | Megasphaera elsdenii DSM             | Selenomonas ruminantium subsp.                       |
| Alkaliphilus metalliredigens QYMF       | Candidatus Phytoplasma mali                   | Denitrovibrio acetophilus DSM            | Mesoplasma florum L1                 | Selenomonas sputigena ATCC                           |
| Asticcacaulis excentricus CB            | Candidatus Protochlamydia amoebophila         | Desulfarculus baarsii DSM                | Moorella thermoacetica ATCC          | Sphingobacterium sp. 21                              |
| Bacillus amyloliquefaciens XH7          | Candidatus Rickettsia amblyommii              | Desulfatibacillum aikenivorans AK-01     | Mycoplasma mycoides subsp.           | Spiroplasma chrysopticola DF-1                       |
| Bacillus amyloliquefaciens Y2           | Capnocytophaga canimorsus Cc5                 | Desulfotobacterium dehalogenans ATCC     | Mycoplasma putrefaciens Mput9231     | Spiroplasma diminutum CUAS-1                         |
| Bacillus cereus E33L                    | Clavibacter michiganensis subsp.              | Desulfotobacterium dichloroeliminans LMG | Mycoplasma suis K13806               | Spiroplasma syrrhidicola EA-1                        |
| Bacillus thuringiensis serovar          | Clostridium acetobutylicum EA                 | Desulfobacca acetoxidans DSM             | Odoribacter splanchnicus DSM         | Spiroplasma taiwanense CT-1                          |
| Bacteroides fragilis 638R               | Clostridium acidurici 9a                      | Echinicola vietnamensis DSM              | Oscillibacter valericigenes Sjm18-20 | Streptococcus parasanguinis FW213                    |
| Bacteroides fragilis NCTC               | Clostridium autoethanogenum DSM               | Enterococcus faecium Aus0085             | Paludibacter propionigenes WB4       | Streptococcus pseudopneumoniae IS7493                |
| Bacteroides fragilis YCH46              | Clostridium beijerinckii NCIMB                | Enterococcus hirae ATCC                  | Parabacteroides distans ATCC         | Streptococcus thermophilus ND03                      |
| Bacteroides helcogenes P                | Clostridium botulinum A                       | Enterococcus mundtii QU                  | Pedococcus pentosaceus SL4           | Tannerella forsythia ATCC                            |
| Bacteroides thetaiotaomicron VPI-5482   | Clostridium botulinum B                       | Erysipelothrix rhusiopathiae SY1027      | Pedobacter heparinus DSM             | Tetragenococcus halophilus NBRC                      |
| Bacteroides vulgatus ATCC               | Clostridium botulinum H04402                  | Escherichia coli LF82                    | Pedobacter saltans DSM               | Tolomonas auensis DSM                                |
| Bartonella australis Aust/NH1           | Clostridium cellulolyticum H10                | Escherichia coli NA114                   | Pelagibacterium halotolerans B2      | Variovorax paradoxus B4                              |
| Bartonella bacilliformis KCS83          | Clostridium cellulovorans 743B                | Ethanoligenens harbinense YUAN-3         | Porphyromonas gingivalis ATCC        | Variovorax paradoxus EPS                             |
| Bartonella clarridgeiae 73              | Clostridium cf. saccharolyticum               | Eubacterium cylindroides T2-87           | Prevotella denticola F0289           | Variovorax paradoxus S110                            |
| Bifidobacterium adolescentis ATCC       | Clostridium clariflavum DSM                   | Eubacterium eligens ATCC                 | Prevotella intermedia 17             | Veillonella parvula DSM                              |
| Bifidobacterium bifidum BGN4            | Clostridium difficile R20291                  | Eubacterium rectale ATCC                 | Prevotella melaninogenica ATCC       | Yersinia enterocolitica subsp. enterocolitica 8081   |
| Bifidobacterium bifidum PRL2010         | Clostridium phytofermentans ISDg              | Eubacterium siraeum V10Sc8a              | Ralstonia eutropha H16               | Yersinia enterocolitica subsp. palearctica 105.5R(r) |
| Bifidobacterium breve UCC2003           | Clostridium saccharolyticum WM1               | Faecalibacterium prausnitzii L2-6        | Ralstonia eutropha JMP134            | Yersinia enterocolitica subsp. palearctica Y11       |
| Bifidobacterium longum DJO10A           | Clostridium sp. SY8519                        | Ferrimonas balearica DSM                 | Ralstonia solanacearum CMR15         | Yersinia pestis A1122                                |
| Brevibacillus brevis NBRC               | Clostridium stercorarium subsp.               | Fibrobacter succinogenes subsp.          | Rhodospirillum rubrum F11            | Yersinia pestis Angola                               |
| Brevundimonas subvibrioides ATCC        | Clostridium thermocellum DSM                  | Filifactor alocis ATCC                   | Rivularia sp. PCC                    | Yersinia pestis Antiqua                              |
| Butyrate-producing bacterium SSC/2      | Coprococcus catus GD/7                        | Finexgoldia magna ATCC                   | Roseburia intestinalis XB6B4         | Yersinia pseudotuberculosis IP                       |

**Figure S16:** Color codes for all the 150 species used in simulation settings 4-5.

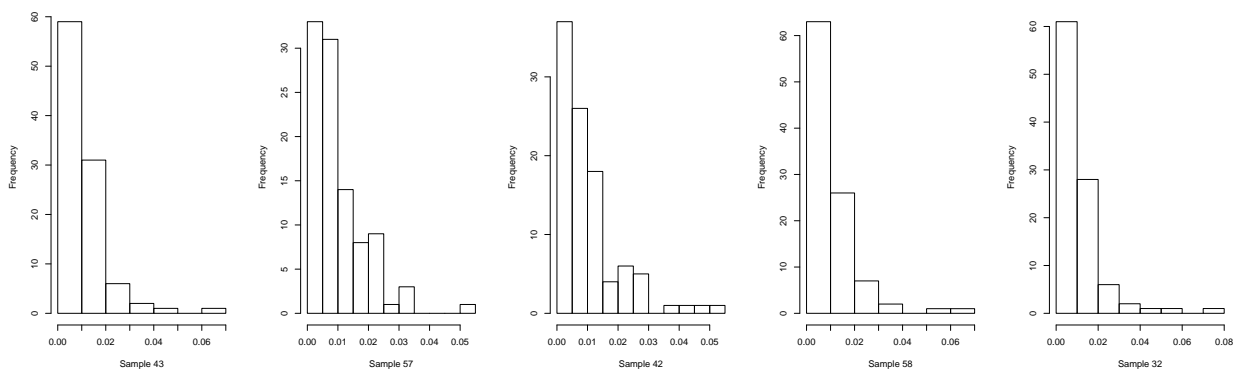

**Figure S17:** Histogram of the relative abundance of different species for the 5 randomly selected samples for the metagenomic data sets with the pooled sequencing depth at 80x, the number of samples at 80, and the number of species at 100.

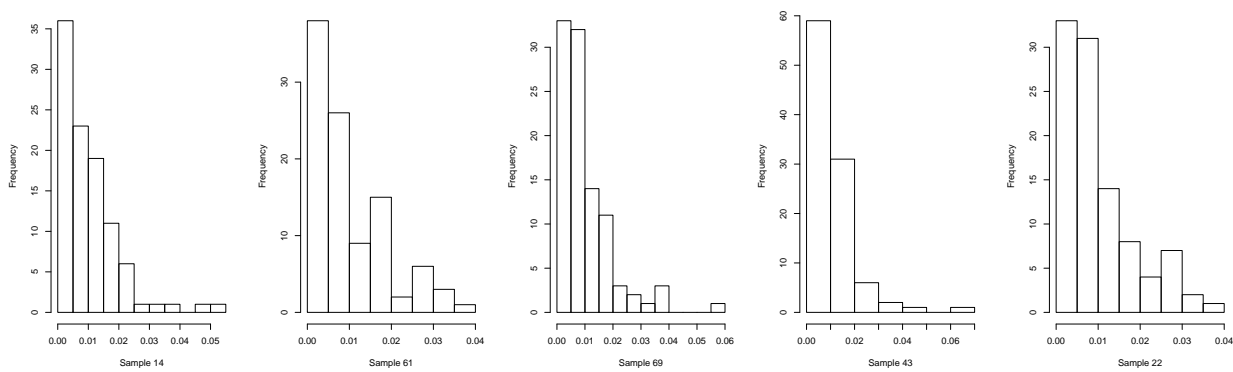

**Figure S18:** Histogram of the relative abundance of different species for the 5 randomly selected samples for the metagenomic data sets with the pooled sequencing depth at 120x, the number of samples at 80, and the number of species at 100.

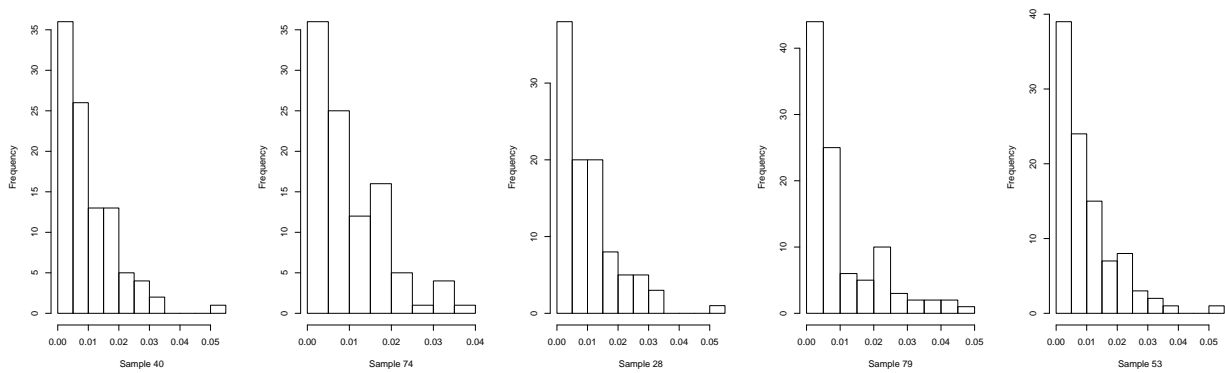

**Figure S19:** Histogram of the relative abundance of different species for the 5 randomly selected samples for the metagenomic data sets with the pooled sequencing depth at 160x, the number of samples at 80, and the number of species at 100.

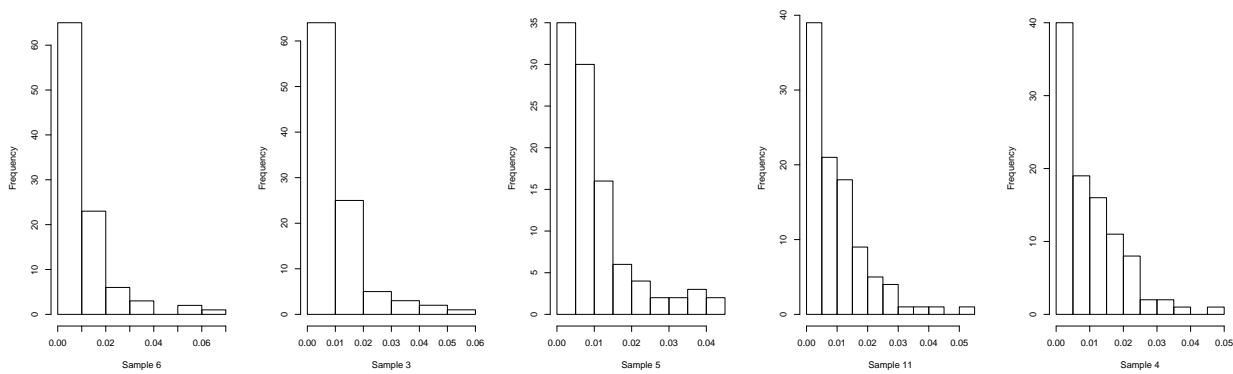

**Figure S20:** Histogram of the relative abundance of different species for the 5 randomly selected samples for the metagenomic data sets with the pooled sequencing depth at 120x, the number of samples at 20, and the number of species at 100.

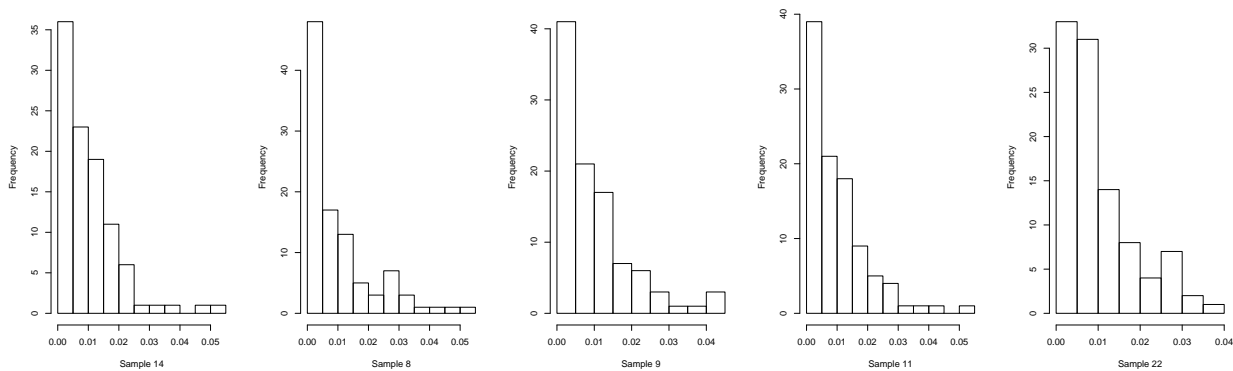

**Figure S21:** Histogram of the relative abundance of different species for the 5 randomly selected samples for the metagenomic data sets with the pooled sequencing depth at 120x, the number of samples at 40, and the number of species at 100.

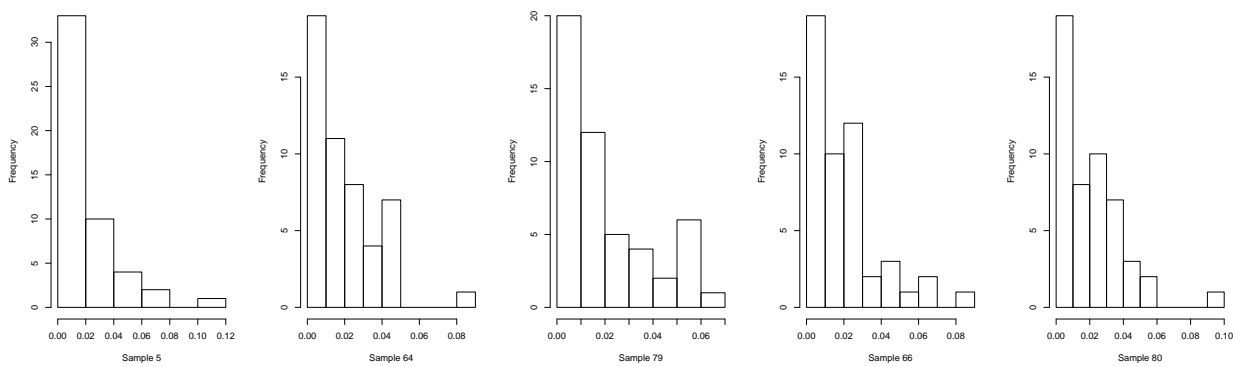

**Figure S22:** Histogram of the relative abundance of different species for the 5 randomly selected samples for the metagenomic data sets with the pooled sequencing depth at 120x, the number of samples at 80, and the number of species at 50.

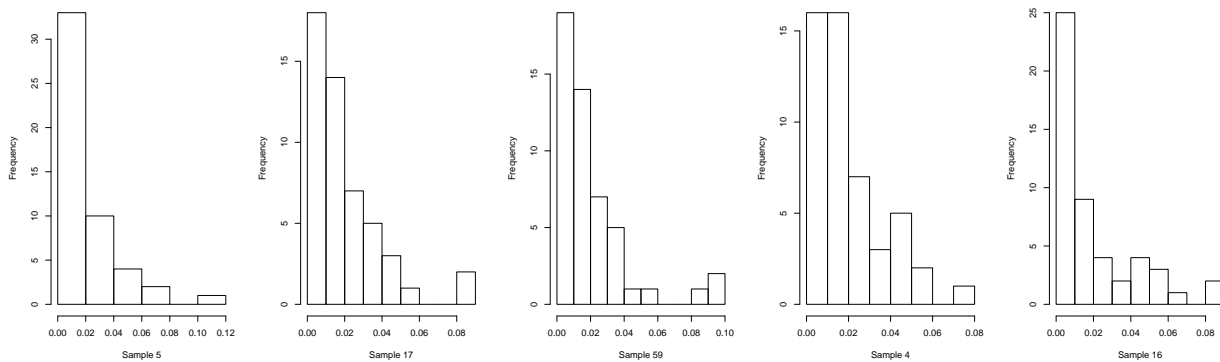

**Figure S23:** Histogram of the relative abundance of different species for the 5 randomly selected samples for the metagenomic data sets with the pooled sequencing depth at 120x, the number of samples at 80, and the number of species at 150.

## 2 Software parameter settings

We used the default parameter settings for MetaGen, MaxBin and MetaBAT for automatically selecting the number of species. For CONCOCT, we set the true number of species as the maximum number of species and kept the other settings as default. For the reference-based method CLARK, we selected the “bacteria” database and set the taxonomy rank as “species”. To map the contigs assembled in our real data examples, we searched the NCBI nucleotide database and used TAXAassign (<https://github.com/umerijaz/TAXAassign>) to assign them to taxonomic groups. We set the thresholds for the minimum percentage identity as 60, 70, 80, 95, 95, 97 for phylum, class, order, family, genus, species, respectively.

In the simulation study, we ran MetaGen with default pipeline in our software user manual to do the pooled assembly (with Ray or MEGAHIT assembler) and extract the read counting mapping matrix. For simulation 1-4 and 6-7, we use parameter settings `-s 10 -i 10 -o 2` (with `-t 0.05` for the case with number of sample less or equal than 10). For simulation setting 5, we use the parameter settings `-t 0.01 -s 10 -i 10 -o 2`. As documented in our user manual, the option `-t` is used to specify the threshold for the initial values. It is recommended to set this number smaller(0.01 -0.1) when the number of samples is less than 10 and (0.1-0.2) when the number of samples is larger than 10. The default value is set as 0.1. The option `-s` sets the minimum number of bins. The option `-i` sets the step size to search the optimal number of species using BIC criterion.

### 3 Real Data Sets

#### Metagenomic Analysis of IBD

In this study, we assembled the paired-end reads published in Qin et al. [4] using Ray assembler [5], which generated a total of 3,476,781 contigs. We applied MetaGen on the 71,4582 contigs that are longer than 500bp and identified 2,150 clusters according to our BIC scores (Figure S24). We also aligned all the contigs to the NCBI nucleotide database using BLAST, and found that 47,565 contigs have a close match to the species in the database.

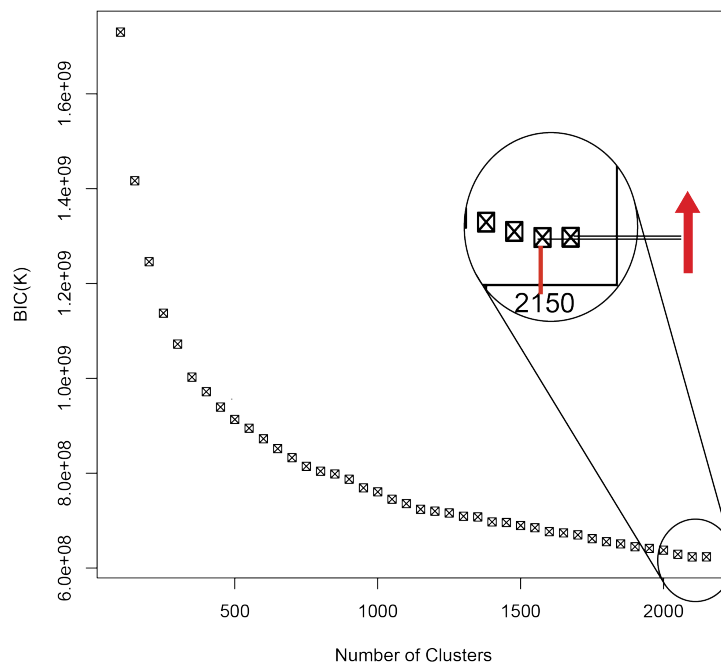

**Figure S24:** BIC scores of MetaGen for the IBD dataset containing 124 metagenomic samples.

## Metagenomic Analysis for T2D

In this study, we assembled the paired-end reads published in Qin et al. [6] using Ray assembler [5], which generated a total of 465,496 contigs that are longer than 500bp. In Figure **S25**, the BIC score is minimized when the number of clusters reaches 2450. Among all the contigs, 44,297 can be aligned to reference genomes in the NCBI nucleotide database using BLAST.

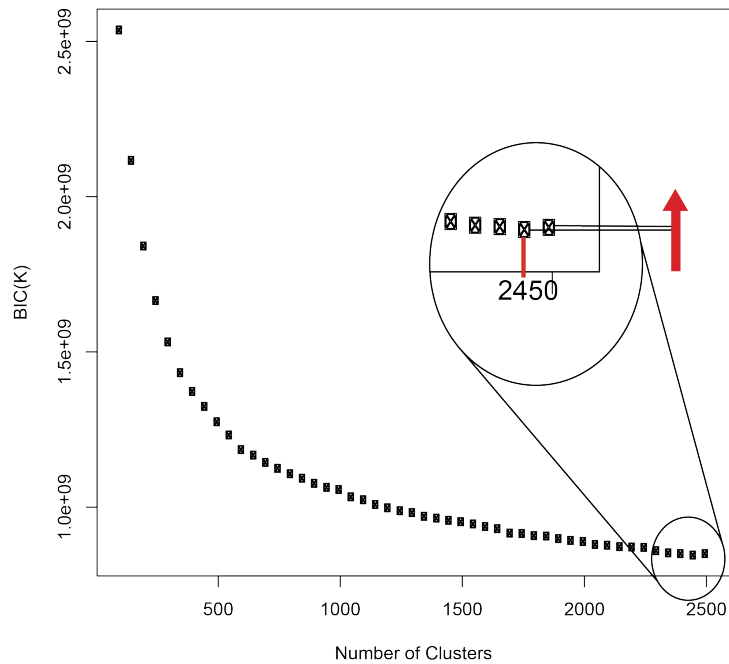

**Figure S25:** BIC scores of MetaGen for the T2D dataset containing 145 metagenomic samples.

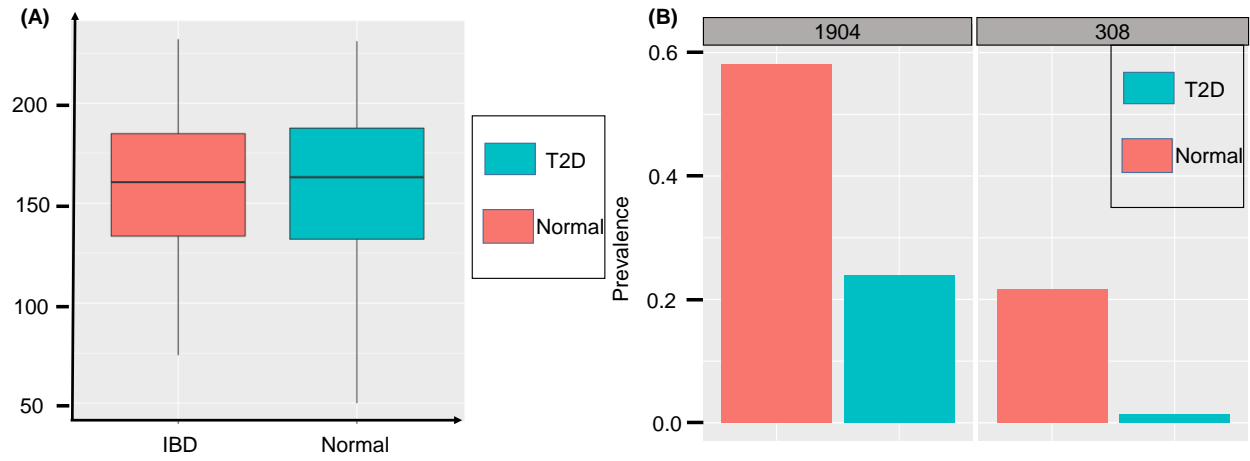

**Figure S26:** The boxes in (A) represent the distributions of the number of bacterial species in individuals of the normal control and T2D groups, respectively. Plotted in (B) are the prevalences of the 2 clusters (1904 and 308) that are less commonly seen in T2D patients compared to normal controls.



## Metagenomic Analysis for Obesity

The DNA samples were sequenced using Pyrosequencing 454 with 9,395,811 total reads for all samples. The pooled short reads from 18 samples were assembled into contigs by the Ray Assembler [5]. A total of 712,751 contigs were constructed, among which 33,107 are longer than 500bp. We further removed 7,724 contigs with fewer than 10 total mapped reads.

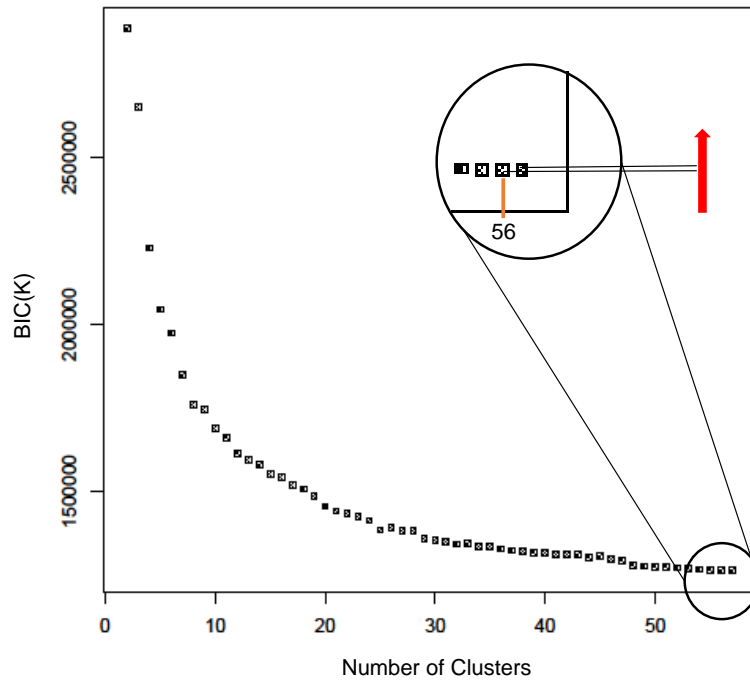

**Figure S27:** BIC scores of MetaGen for the obesity dataset containing 18 metagenomic samples.

## 4 Supplementary Note

### LASSO-logistic regression for real data

Let  $y_j$  denote the group membership of the  $j$ th individual, where  $y_j = 0$  indicates the control group and  $y_j = 1$ , the patient group. The logistic regression model assumes that

$$\log \frac{Pr(y_j = 0)}{Pr(y_j = 1)} = \beta_0 + \beta_1 \log(\hat{b}_{j1}) + \cdots + \beta_K \log(\hat{b}_{jK}) \quad (1)$$

where  $\hat{b}_{jk}$  is the relative species abundance (see **Materials and Methods** (7)). To alleviate the overfitting, we employed LASSO penalty on  $\beta_0, \dots, \beta_K$  by assuming  $\sum_{k=1}^K |\beta_k| \leq \tau$ , where  $\tau$  is selected by leave-one-out cross validation [7].

### Calculating the phylum level relative abundance

Bins are pooled into one phylum if more than 50% of contigs in these bins are mapped to that phylum. For the obesity data set, there are 25 bins that can be mapped to one of the four given phyla. We calculated the relative abundance (see **Materials and Methods**) for each phylum by aggregating the relative abundance of all identified species in this phylum.

### Prediction result with CLARK

We applied the same prediction procedure to predict the disease state using the relative abundance outputted by CLARK. The leave-one-out of cross validation error rate is 0.137 and 0.290 for the IBD and T2D data set, which is higher than the error rate predicted by MetaGen.

## Supplementary Tables for species name and taxon ID

| Species Name                                          | Taxon ID | Species Name                                               | Taxon ID |
|-------------------------------------------------------|----------|------------------------------------------------------------|----------|
| <i>Acholeplasma laidlawii</i> PG-8A                   | 441768   | <i>Achromobacter xylosoxidans</i> A8                       | 762376   |
| <i>Achromobacter xylosoxidans</i> NH44784-1996        | 1167634  | <i>Akkermansia muciniphila</i> ATCC BAA 835                | 349741   |
| <i>Alistipes finegoldii</i> DSM 17242                 | 679935   | <i>Alistipes shahii</i> WAL 8301                           | 717959   |
| <i>Alkalilimnicola ehrlichii</i> MLHE-1               | 187272   | <i>Alkaliphilus metalliredigens</i> QYMF                   | 293826   |
| <i>Asticcacaulis excentricus</i> CB 48                | 573065   | <i>Bacillus amyloliquefaciens</i> XH7                      | 1034836  |
| <i>Bacillus amyloliquefaciens</i> Y2                  | 1126211  | <i>Bacillus cereus</i> E33L                                | 288681   |
| <i>Bacillus thuringiensis</i> serovar konkukian 97 27 | 1279365  | <i>Bacteroides fragilis</i> 638R                           | 862962   |
| <i>Bacteroides fragilis</i> NCTC 9343                 | 272559   | <i>Bacteroides fragilis</i> YCH46                          | 295405   |
| <i>Bacteroides helcogenes</i> P 36 108                | 693979   | <i>Bacteroides thetaiotaomicron</i> VPI 5482               | 226186   |
| <i>Bacteroides vulgatus</i> ATCC 8482                 | 435590   | <i>Bartonella australis</i> Aust/NH1                       | 1094489  |
| <i>Bartonella bacilliformis</i> KC583                 | 360095   | <i>Bartonella clarridgeiae</i> 73                          | 696125   |
| <i>Bifidobacterium adolescentis</i> ATCC 15703        | 367928   | <i>Bifidobacterium bifidum</i> BGN4                        | 484020   |
| <i>Bifidobacterium bifidum</i> PRL2010 chromosome     | 702459   | <i>Bifidobacterium breve</i> UCC2003                       | 326426   |
| <i>Bifidobacterium longum</i>                         | 205913   | <i>Brevibacillus brevis</i> NBRC 100599                    | 358681   |
| <i>Brevundimonas subvibrioides</i> ATCC 15264         | 633149   | Butyrate producing bacterium SSC 2                         | 245018   |
| <i>Butyrivibrio proteoclasticus</i> B316              | 515622   | Candidatus <i>Accumulibacter phosphatis</i> clade IIA UW 1 | 511995   |
| Candidatus <i>Arthromitus</i> sp. SFB-mouse-Yit       | 1041809  | Candidatus <i>Chloracidobacterium thermophilum</i> B       | 981222   |
| Candidatus <i>Liberibacter solanacearum</i> CLso ZC1  | 658172   | Candidatus <i>Nitrospira defluvii</i>                      | 330214   |
| Candidatus <i>Pelagibacter</i> sp. IMCC9063           | 1002672  | Candidatus <i>Phytoplasma mali</i>                         | 37692    |
| Candidatus <i>Protochlamydia amoebophila</i> UWE25    | 264201   | Candidatus <i>Rickettsia amblyommii</i> str. GAT-30V       | 1105111  |
| <i>Capnocytophaga canimorsus</i> Cc5                  | 860228   | <i>Clavibacter michiganensis</i> sepedonicus               | 31964    |
| <i>Clostridium acetobutylicum</i> EA 2018             | 863638   | <i>Clostridium acidurici</i> 9a                            | 1128398  |
| <i>Clostridium autoethanogenum</i> DSM 10061          | 1341692  | <i>Clostridium beijerinckii</i>                            | 290402   |
| <i>Clostridium botulinum</i> A str. ATCC 3502         | 413999   | <i>Clostridium botulinum</i> B str. Eklund 17B             | 935198   |
| <i>Clostridium botulinum</i> H04402 065               | 941968   | <i>Clostridium cellulolyticum</i> H10                      | 394503   |
| <i>Clostridium cellulovorans</i> 743B                 | 573061   | <i>Clostridium cf saccharolyticum</i> K10                  | 717608   |
| <i>Clostridium clariflavum</i> DSM 19732              | 720554   | <i>Clostridium difficile</i> R20291                        | 645463   |
| <i>Clostridium phytofermentans</i> ISDg               | 357809   | <i>Clostridium saccharolyticum</i> WM1                     | 610130   |
| <i>Clostridium stercoarium</i> DSM 8532               | 1121335  | <i>Clostridium</i> SY8519                                  | 1042156  |
| <i>Clostridium thermocellum</i> DSM 1313              | 637887   | <i>Coprococcus</i> ART55 1                                 | 751585   |

|                                                    |         |                                                                |         |
|----------------------------------------------------|---------|----------------------------------------------------------------|---------|
| <i>Coprococcus catus</i> GD 7                      | 717962  | <i>Coriobacterium glomerans</i> PW2                            | 700015  |
| <i>Corynebacterium argentoratense</i> DSM 44202    | 1348662 | <i>Cryptobacterium curtum</i> DSM 15641                        | 469378  |
| <i>Cupriavidus metallidurans</i> CH34              | 266264  | <i>Cylindrospermum stagnale</i> PCC 7417                       | 56107   |
| <i>Dehalobacter</i> CF                             | 1131462 | <i>Denitrovibrio acetiphilus</i> DSM 12809                     | 522772  |
| <i>Desulfarculus baarsii</i> DSM 2075              | 644282  | <i>Desulfatibacillum alkenivorans</i> AK-01                    | 439235  |
| <i>Desulfitobacterium dehalogenans</i> ATCC 51507  | 756499  | <i>Desulfitobacterium dichloroeliminans</i> LMG P 21439        | 871963  |
| <i>Desulfotomaculum acetoxidans</i> DSM 11109      | 880072  | <i>Echinicola vietnamensis</i> DSM 17526                       | 926556  |
| <i>Enterococcus faecium</i> Aus0085                | 1305849 | <i>Enterococcus hirae</i> ATCC 9790                            | 768486  |
| <i>Enterococcus mundtii</i> QU 25                  | 1300150 | <i>Erysipelothrix rhusiopathiae</i> SY1027                     | 1313290 |
| <i>Escherichia coli</i> LF82                       | 591946  | <i>Escherichia coli</i> NA114                                  | 1033813 |
| <i>Ethanoligenens harbinense</i> YUAN 3            | 663278  | <i>Eubacterium cylindroides</i> T2 87                          | 717960  |
| <i>Eubacterium eligens</i> ATCC 27750              | 515620  | <i>Eubacterium rectale</i> ATCC 33656                          | 515619  |
| <i>Eubacterium siraeum</i> V10Sc8a                 | 717961  | <i>Faecalibacterium prausnitzii</i> L2-6                       | 718252  |
| <i>Ferrimonas balearica</i> DSM 9799               | 550540  | <i>Fibrobacter succinogenes</i> subsp. <i>succinogenes</i> S85 | 59374   |
| <i>Filifactor alocis</i> ATCC 35896                | 546269  | <i>Finegoldia magna</i> ATCC 29328                             | 334413  |
| <i>Flavobacteriaceae bacterium</i> 3519-10         | 531844  | <i>Fusobacterium nucleatum</i> ATCC 25586                      | 190304  |
| <i>Haemophilus parainfluenzae</i> T3T1             | 862965  | <i>Herbaspirillum seropedicae</i> SmR1                         | 757424  |
| <i>Janthinobacterium</i> Marseille                 | 375286  | <i>Lawsonia intracellularis</i> PHE MN1 00                     | 363253  |
| <i>Megasphaera elsdenii</i> DSM 20460              | 1064535 | <i>Mesoplasma florum</i> L1                                    | 265311  |
| <i>Moorella thermoacetica</i> ATCC 39073           | 264732  | <i>Mycoplasma mycoides capri</i> LC 95010                      | 862259  |
| <i>Mycoplasma putrefaciens</i> Mput9231            | 1292033 | <i>Mycoplasma suis</i> KI3806                                  | 708248  |
| <i>Odoribacter splanchnicus</i> DSM 20712          | 709991  | <i>Oscillibacter valericigenes</i> Sjm18-20                    | 693746  |
| <i>Paludibacter propionicigenes</i> WB4            | 694427  | <i>Parabacteroides distasonis</i> ATCC 8503                    | 435591  |
| <i>Pediococcus pentosaceus</i> SL4                 | 1408206 | <i>Pedobacter heparinus</i> DSM 2366                           | 485917  |
| <i>Pedobacter saltans</i> DSM 12145                | 762903  | <i>Pelagibacterium halotolerans</i> B2                         | 1082931 |
| <i>Porphyromonas gingivalis</i> ATCC 33277         | 431947  | <i>Prevotella denticola</i> F0289                              | 767031  |
| <i>Prevotella intermedia</i> 17                    | 246198  | <i>Prevotella melaninogenica</i> ATCC 25845                    | 553174  |
| <i>Ralstonia eutropha</i> H16                      | 381666  | <i>Ralstonia eutropha</i> JMP134                               | 264198  |
| <i>Ralstonia solanacearum</i> CMR15                | 859655  | <i>Rhodospirillum rubrum</i> F11                               | 1036743 |
| <i>Rivularia</i> PCC 7116                          | 373994  | <i>Roseburia intestinalis</i> XB6B4                            | 718255  |
| <i>Ruminococcus albus</i> 7                        | 697329  | <i>Ruminococcus bromii</i> L2-63                               | 657321  |
| <i>Ruminococcus champanellensis</i> 18P13          | 213810  | <i>Ruminococcus obeum</i>                                      | 657314  |
| <i>Ruminococcus</i> sp. SR1/5                      | 657323  | <i>Ruminococcus torques</i> L2-14                              | 657313  |
| <i>Selenomonas ruminantium lactilytica</i> TAM6421 | 927704  | <i>Selenomonas sputigena</i> ATCC 35185                        | 546271  |
| <i>Sphingobacterium</i> 21                         | 743722  | <i>Spiroplasma chrysopicola</i> DF-1                           | 1276227 |
| <i>Spiroplasma diminutum</i> CUAS 1                | 1276221 | <i>Spiroplasma syrphidicola</i> EA 1                           | 1276229 |
| <i>Spiroplasma taiwanense</i> CT 1                 | 1276220 | <i>Streptococcus parasangnis</i> FW213                         | 1114965 |

|                                                    |         |                                                |         |
|----------------------------------------------------|---------|------------------------------------------------|---------|
| Streptococcus pseudopneumoniae IS7493              | 1054460 | Streptococcus thermophilus ND03                | 767463  |
| Tannerella forsythia ATCC 43037                    | 203275  | Tetragenococcus halophilus NBRC 12172          | 945021  |
| Tolomonas auensis DSM 9187                         | 595494  | Variovorax paradoxus B4                        | 1246301 |
| Variovorax paradoxus EPS                           | 595537  | Variovorax paradoxus S110                      | 543728  |
| Veillonella parvula DSM 2008                       | 479436  | Yersinia enterocolitica palearctica 105 5R r   | 994476  |
| Yersinia enterocolitica subsp. enterocolitica 8081 | 393305  | Yersinia enterocolitica subsp. palearctica Y11 | 930944  |
| Yersinia pestis A1122                              | 1035377 | Yersinia pestis Angola                         | 349746  |
| Yersinia pestis Antiqua                            | 360102  | Yersinia pseudotuberculosis IP 32953           | 273123  |

**Table 1:** 150 genomes used in the simulation study with species names and NCBI taxon id.

| Species Name | Taxon ID | Species Name   | Taxon ID |
|--------------|----------|----------------|----------|
| E coli 536   | 362663   | E coli APEC O1 | 405955   |
| E coli IAI1  | 585034   | E coli SE11    | 409438   |
| E coli DH1   | 536056   | E coli HS      | 331112   |

**Table 2:** 6 *E coli* strains used in the simulation setting 4

| Species Name                         | Taxon ID | Species Name                                           | Taxon ID |
|--------------------------------------|----------|--------------------------------------------------------|----------|
| <i>Eubacterium rectale</i>           | 39491    | <i>Propionibacterium freudenreichii</i>                | 1744     |
| <i>Bacteroides vulgatus</i>          | 821      | <i>Conexibacter woesei</i>                             | 191495   |
| <i>Roseburia hominis</i>             | 301301   | <i>Alkalilimnicola ehrlichii</i>                       | 351052   |
| <i>Akkermansia muciniphila</i>       | 239935   | <i>Geobacter uraniireducens</i>                        | 351604   |
| <i>Alistipes finegoldii</i>          | 214856   | <i>Laribacter hongkongensis</i>                        | 168471   |
| <i>Alistipes shahii</i>              | 328814   | <i>Streptococcus anginosus</i>                         | 1328     |
| <i>Eubacterium eligens</i>           | 39485    | <i>Syntrophomonas wolfei</i>                           | 863      |
| <i>Bacteroides thetaiotaomicron</i>  | 818      | <i>Aeromonas hydrophila</i>                            | 644      |
| <i>Odoribacter splanchnicus</i>      | 28118    | <i>Bacillus megaterium</i>                             | 1404     |
| <i>Bacteroides fragilis</i>          | 817      | <i>Corynebacterium aurimucosum</i>                     | 169292   |
| <i>Parabacteroides distasonis</i>    | 823      | <i>Salinibacter ruber</i>                              | 146919   |
| <i>Bacteroides helcogenes</i>        | 290053   | <i>Weissella koreensis</i>                             | 165096   |
| <i>Bifidobacterium adolescentis</i>  | 1680     | <i>Alicyclophilus denitrificans</i>                    | 179636   |
| <i>Prevotella melaninogenica</i>     | 28132    | <i>Rhodospirillum rubrum</i>                           | 1085     |
| <i>Escherichia coli</i>              | 562      | <i>Shigella flexneri</i>                               | 623      |
| <i>Prevotella ruminicola</i>         | 839      | <i>Zobellia galactanivorans</i>                        | 63186    |
| <i>Clostridium</i> sp. SY8519        | 1042156  | <i>Asticcacaulis excentricus</i>                       | 78587    |
| <i>Haemophilus parainfluenzae</i>    | 729      | <i>Herbaspirillum seropedicae</i>                      | 964      |
| <i>Clostridium saccharolyticum</i>   | 84030    | <i>Polaribacter</i> sp. MED152                         | 313598   |
| <i>Oscillibacter valericigenes</i>   | 351091   | <i>Thermoanaerobacterium</i> xy-<br><i>lanolyticum</i> | 29329    |
| <i>Prevotella dentalis</i>           | 52227    | <i>Marivirga tractuosa</i>                             | 1006     |
| <i>Bacteroides salanitronis</i>      | 376805   | <i>Phycisphaera mikurensis</i>                         | 547188   |
| <i>Bifidobacterium longum</i>        | 216816   | <i>Deinococcus proteolyticus</i>                       | 55148    |
| <i>Prevotella intermedia</i>         | 28131    | <i>Geobacter sulfurreducens</i>                        | 35554    |
| <i>Streptococcus suis</i>            | 1307     | <i>Spirochaeta thermophila</i>                         | 154      |
| <i>Prevotella denticola</i>          | 28129    | <i>Streptococcus</i> sp. I-G2                          | 1156431  |
| <i>Prevotella</i> sp. oral taxon 299 | 652716   | <i>Streptococcus intermedius</i>                       | 1338     |
| <i>Ruminococcus champanellensis</i>  | 1161942  | <i>Alkaliphilus metalliredigens</i>                    | 208226   |
| <i>Methanobrevibacter smithii</i>    | 2173     | <i>Brachyspira pilosicoli</i>                          | 52584    |
| <i>Streptococcus thermophilus</i>    | 1308     | <i>Desulfovibrio salexigens</i>                        | 880      |
| <i>Adlercreutzia equolifaciens</i>   | 446660   | <i>Synechococcus</i> sp. WH 7803                       | 32051    |
| <i>Ethanoligenens harbinense</i>     | 253239   | <i>Advenella kashmirensis</i>                          | 310575   |
| <i>Bifidobacterium bifidum</i>       | 1681     | <i>Sinorhizobium medicae</i>                           | 110321   |
| <i>Butyrivibrio proteoclasticus</i>  | 43305    | <i>Streptococcus oralis</i>                            | 1303     |
| <i>Ruminococcus albus</i>            | 1264     | <i>Acetohalobium arabaticum</i>                        | 28187    |
| <i>Enterococcus faecium</i>          | 1352     | <i>Anaeromyxobacter</i> sp. Fw109-5                    | 404589   |
| <i>Eubacterium limosum</i>           | 1736     | <i>Cupriavidus taiwanensis</i>                         | 164546   |
| <i>Lactobacillus delbrueckii</i>     | 1584     | <i>Micavibrio aeruginosavorus</i>                      | 349221   |
| <i>Streptococcus salivarius</i>      | 1304     | <i>Streptococcus agalactiae</i>                        | 1311     |

|                                      |        |                                             |         |
|--------------------------------------|--------|---------------------------------------------|---------|
| <i>Streptococcus lutetiensis</i>     | 150055 | <i>Corynebacterium variabile</i>            | 1727    |
| <i>Tannerella forsythia</i>          | 28112  | <i>Xanthobacter autotrophicus</i>           | 280     |
| <i>Gordonibacter pamelaee</i>        | 471189 | <i>Phenylobacterium zucineum</i>            | 284016  |
| <i>Veillonella parvula</i>           | 29466  | <i>Ramlibacter tataouinensis</i>            | 94132   |
| <i>Bifidobacterium breve</i>         | 1685   | <i>Paenibacillus</i> sp. JDR-2              | 324057  |
| <i>Desulfovibrio desulfuricans</i>   | 876    | <i>Spirochaeta africana</i>                 | 46355   |
| <i>Campylobacter jejuni</i>          | 197    | <i>Thermosediminibacter oceani</i>          | 291990  |
| <i>Eggerthella lenta</i>             | 84112  | <i>Pseudomonas mendocina</i>                | 300     |
| <i>Streptococcus parasanguinis</i>   | 1318   | <i>Caldicellulosiruptor kronotskyensis</i>  | 413889  |
| <i>Clostridium botulinum</i>         | 1491   | <i>Deinococcus maricopensis</i>             | 309887  |
| <i>Desulfovibrio vulgaris</i>        | 881    | <i>Pseudomonas protegens</i>                | 380021  |
| <i>Acidaminococcus fermentans</i>    | 905    | <i>Anaeromyxobacter dehalogenans</i>        | 161493  |
| <i>Enterococcus faecalis</i>         | 1351   | <i>Rhizobium</i> sp. IRBG74                 | 424182  |
| <i>Acidaminococcus intestini</i>     | 187327 | <i>Thermanaerovibrio acidaminovorans</i>    | 81462   |
| <i>Porphyromonas gingivalis</i>      | 837    | <i>Pseudoxanthomonas suwonensis</i>         | 314722  |
| <i>Haemophilus influenzae</i>        | 727    | <i>Verminephrobacter eiseniae</i>           | 364317  |
| <i>Treponema succinifaciens</i>      | 167    | <i>Syntrophobacter fumaroxidans</i>         | 119484  |
| <i>Eggerthella</i> sp. YY7918        | 502558 | <i>Treponema azotonutricium</i>             | 150829  |
| <i>Streptococcus pyogenes</i>        | 1314   | <i>Treponema brennaboreense</i>             | 81028   |
| <i>Lactobacillus ruminis</i>         | 1623   | <i>Beijerinckia indica</i>                  | 533     |
| <i>Slackia heliotrinireducens</i>    | 84110  | <i>Acholeplasma brassicae</i>               | 61635   |
| <i>Olsenella uli</i>                 | 133926 | <i>Actinobacillus pleuropneumoniae</i>      | 715     |
| <i>Lactococcus lactis</i>            | 1358   | <i>Oligotropha carboxidovorans</i>          | 40137   |
| <i>Salmonella enterica</i>           | 28901  | <i>Wolinella succinogenes</i>               | 844     |
| <i>Streptococcus pasteurianus</i>    | 197614 | <i>Desulfitobacterium dehalogenans</i>      | 36854   |
| <i>Porphyromonas asaccharolytica</i> | 28123  | <i>Rhodococcus equi</i>                     | 43767   |
| <i>Solitaea canadensis</i>           | 995    | <i>Arthrobacter</i> sp. FB24                | 290399  |
| <i>Bifidobacterium animalis</i>      | 28025  | <i>Magnetococcus marinus</i>                | 1124597 |
| <i>Selenomonas ruminantium</i>       | 971    | [ <i>Bacillus</i> ] <i>selenitireducens</i> | 85683   |
| <i>Coriobacterium glomerans</i>      | 33871  | <i>Chromohalobacter salexigens</i>          | 158080  |
| <i>Megasphaera elsdenii</i>          | 907    | <i>Desulfosporosinus acidiphilus</i>        | 885581  |
| <i>Sorangium cellulosum</i>          | 56     | <i>Methylocystis</i> sp. SC2                | 187303  |
| <i>Selenomonas sputigena</i>         | 69823  | <i>Corynebacterium glutamicum</i>           | 1718    |
| <i>Treponema denticola</i>           | 158    | <i>Acidovorax</i> sp. KKS102                | 358220  |
| <i>Paenibacillus mucilaginosus</i>   | 61624  | <i>Chlorobium limicola</i>                  | 1092    |
| <i>Heliobacterium modesticaldum</i>  | 35701  | <i>Rhizobium etli</i>                       | 29449   |
| <i>Paludibacter propionicigenes</i>  | 185300 | <i>Xanthomonas campestris</i>               | 339     |
| <i>Bifidobacterium dentium</i>       | 1689   | <i>Brachybacterium faecium</i>              | 43669   |
| <i>Saprospira grandis</i>            | 1008   | <i>Gloeobacter violaceus</i>                | 33072   |
| <i>Riemerella anatipestifer</i>      | 34085  | <i>Kocuria rhizophila</i>                   | 72000   |
| <i>Lawsonia intracellularis</i>      | 29546  | <i>Acholeplasma palmae</i>                  | 38986   |
| <i>Streptococcus mitis</i>           | 28037  | <i>Leifsonia xyli</i>                       | 1575    |

|                                              |        |                                      |        |
|----------------------------------------------|--------|--------------------------------------|--------|
| Desulfovibrio gigas                          | 879    | Stackebrandtia nassauensis           | 283811 |
| Syntrophobotulus glycolicus                  | 51197  | Thermus thermophilus                 | 274    |
| Gardnerella vaginalis                        | 2702   | Actinoplanes missouriensis           | 1866   |
| Desulfotomaculum acetoxidans                 | 58138  | Streptobacillus moniliformis         | 34105  |
| Anaerococcus prevotii                        | 33034  | Dichelobacter nodosus                | 870    |
| Symbiobacterium thermophilum                 | 2734   | Pseudomonas syringae                 | 317    |
| Chitinophaga pinensis                        | 79329  | Corynebacterium halotolerans         | 225326 |
| Clostridium tetani                           | 1513   | Klebsiella pneumoniae                | 573    |
| Mycobacterium tuberculosis                   | 1773   | Macrococcus caseolyticus             | 69966  |
| Clostridium cellulovorans                    | 1493   | Streptococcus pseudopneumoniae       | 257758 |
| Pseudomonas stutzeri                         | 316    | Thermacetogenium phaeum              | 85874  |
| Clostridium perfringens                      | 1502   | Tistrella mobilis                    | 171437 |
| Candidatus Azobacteroides pseudotriconymphae | 511435 | Wolbachia sp. wRi                    | 66084  |
| Clostridium stercoarium                      | 1510   | Calditerrivibrio nitroreducens       | 477976 |
| Filifactor alocis                            | 143361 | Candidatus Puniceispirillum marinum  | 767892 |
| Cytophaga hutchinsonii                       | 985    | Frateuria aurantia                   | 81475  |
| Clostridium kluveri                          | 1534   | Micrococcus luteus                   | 1270   |
| Desulfovibrio magneticus                     | 184917 | Neisseria meningitidis               | 487    |
| Clostridium saccharobutylicum                | 169679 | Azorhizobium caulinodans             | 7      |
| Clostridium clariflavum                      | 288965 | Azotobacter vinelandii               | 354    |
| Aggregatibacter aphrophilus                  | 732    | Belliella baltica                    | 232259 |
| Rhodopseudomonas palustris                   | 1076   | Marinithermus hydrothermalis         | 186192 |
| Desulfarculus baarsii                        | 453230 | Paenibacillus terrae                 | 159743 |
| Fusobacterium nucleatum                      | 851    | Thiobacillus denitrificans           | 36861  |
| Pseudomonas putida                           | 303    | Candidatus Arthromitus sp. SFB-mouse | 49118  |
| Fibrella aestuarina                          | 651143 | Myxococcus stipitatus                | 83455  |
| Mycoplasma hyopneumoniae                     | 2099   | Pseudovibrio sp. FO-BEG1             | 911045 |
| Clostridium saccharoperbutylacetonicum       | 36745  | Candidatus Accumulibacter phosphatis | 327160 |
| Finegoldia magna                             | 1260   | Catenulispora acidiphila             | 304895 |
| Flavobacterium johnsoniae                    | 986    | Geobacter bemidjiensis               | 225194 |
| Desulfomicrobium baculatum                   | 899    | Oceanimonas sp. GK1                  | 511062 |
| Bifidobacterium thermophilum                 | 33905  | Spiroplasma taiwanense               | 2145   |
| Clostridium sp. BNL1100                      | 755731 | Elusimicrobium minutum               | 423605 |
| Brevibacillus brevis                         | 1393   | Novosphingobium sp. PP1Y             | 702113 |
| Thermaerobacter marianensis                  | 73919  | Clavibacter michiganensis            | 28447  |
| Desulfotomaculum gibsoniae                   | 102134 | Leptotrichia buccalis                | 40542  |
| Clostridium cellulolyticum                   | 1521   | Myxococcus xanthus                   | 34     |
| Niastella koreensis                          | 354356 | Saccharothrix espanaensis            | 103731 |
| Halothiobacillus neapolitanus                | 927    | Flavobacterium branchiophilum        | 55197  |



|                                             |         |                                             |         |
|---------------------------------------------|---------|---------------------------------------------|---------|
| <i>Clostridium acetobutylicum</i>           | 1488    | <i>Gemmatimonas aurantiaca</i>              | 173480  |
| <i>Thermobacillus composti</i>              | 377615  | <i>Polymorphum gilvum</i>                   | 991904  |
| <i>Acetobacterium woodii</i>                | 33952   | <i>Bacillus cereus</i>                      | 1396    |
| <i>Desulfovibrio africanus</i>              | 873     | <i>Caldilinea aerophila</i>                 | 133453  |
| <i>Capnocytophaga ochracea</i>              | 1018    | <i>Cyanothece</i> sp. ATCC 51142            | 43989   |
| <i>Pyrolobus fumarii</i>                    | 54252   | <i>Ruegeria pomeroyi</i>                    | 89184   |
| <i>Fibrobacter succinogenes</i>             | 833     | <i>Arthrospira platensis</i>                | 118562  |
| <i>Mahella australiensis</i>                | 252966  | <i>Desulfohalobium retbaense</i>            | 45663   |
| <i>Pedobacter heparinus</i>                 | 984     | <i>Geobacillus</i> sp. C56-T3               | 691437  |
| <i>Aeromonas salmonicida</i>                | 645     | <i>Myxococcus fulvus</i>                    | 33      |
| <i>Desulfurispirillum indicum</i>           | 936456  | <i>Azoarcus</i> sp. KH32C                   | 748247  |
| <i>Dyadobacter fermentans</i>               | 94254   | <i>Caldisericum exile</i>                   | 693075  |
| <i>Lactobacillus acidophilus</i>            | 1579    | <i>Azospirillum brasilense</i>              | 192     |
| <i>Melioribacter roseus</i>                 | 1134405 | <i>Brevundimonas subvibrioides</i>          | 74313   |
| <i>Dehalococcoides mccartyi</i>             | 61435   | <i>Desulfosporosinus orientis</i>           | 1563    |
| <i>Enterobacter cloacae</i>                 | 550     | <i>Marinobacter hydrocarbonoclasticus</i>   | 2743    |
| <i>Pseudomonas aeruginosa</i>               | 287     | <i>Streptomyces cattleya</i>                | 29303   |
| <i>Serratia marcescens</i>                  | 615     | <i>Agrobacterium fabrum</i>                 | 1176649 |
| <i>Achromobacter xylosoxidans</i>           | 85698   | <i>Polynucleobacter necessarius</i>         | 576610  |
| <i>Azospirillum lipoferum</i>               | 193     | <i>Thermobifida fusca</i>                   | 2021    |
| <i>Clostridium novyi</i>                    | 1542    | <i>Burkholderia pseudomallei</i>            | 28450   |
| <i>Desulfotobacterium hafniense</i>         | 49338   | <i>Cupriavidus metallidurans</i>            | 119219  |
| <i>Desulfotomaculum ruminis</i>             | 1564    | <i>Ferrimonas balearica</i>                 | 44012   |
| <i>Streptococcus pneumoniae</i>             | 1313    | <i>Cellvibrio japonicus</i>                 | 155077  |
| <i>Bacillus coagulans</i>                   | 1398    | <i>Sideroxydans lithotrophicus</i>          | 63745   |
| <i>Desulfovibrio aespoensis</i>             | 182210  | <i>Burkholderia</i> sp. YI23                | 1097668 |
| <i>Rhizobium leguminosarum</i>              | 384     | <i>Deinococcus peraridilitoris</i>          | 432329  |
| <i>Ralstonia solanacearum</i>               | 305     | <i>Geitlerinema</i> sp. PCC 7407            | 1173025 |
| <i>Haliangium ochraceum</i>                 | 80816   | <i>Mycoplasma agalactiae</i>                | 2110    |
| <i>Desulfotobacterium dichloroeliminans</i> | 233055  | <i>Caldicellulosiruptor saccharolyticus</i> | 44001   |
| <i>Escherichia fergusonii</i>               | 564     | <i>Mycobacterium abscessus</i>              | 36809   |
| <i>Variovorax paradoxus</i>                 | 34073   | <i>Streptomyces bingchenggensis</i>         | 379067  |
| <i>Cyanobium gracile</i>                    | 59930   | <i>Candidatus Amoebophilus asiaticus</i>    | 281120  |
| <i>Atopobium parvulum</i>                   | 1382    | <i>Carnobacterium maltaromaticum</i>        | 2751    |
| <i>Erysipelothrix rhusiopathiae</i>         | 1648    | <i>Paracoccus denitrificans</i>             | 266     |
| <i>Chromobacterium violaceum</i>            | 536     | <i>Sphingomonas</i> sp. MM-1                | 745310  |
| <i>Sphaerobacter thermophilus</i>           | 2057    | <i>Zymomonas mobilis</i>                    | 542     |
| <i>Desulfovibrio alaskensis</i>             | 58180   | <i>Chamaesiphon minutus</i>                 | 1173032 |
| <i>Alicyclobacillus acidocaldarius</i>      | 405212  | <i>Pelobacter carbinolicus</i>              | 19      |
| <i>Clostridium beijerinckii</i>             | 1520    | <i>Sebaldella termitidis</i>                | 826     |
| <i>Staphylococcus aureus</i>                | 1280    | <i>Singulisphaera acidiphila</i>            | 466153  |
| <i>Geobacter</i> sp. M21                    | 443144  | <i>Sphingobium</i> sp. SYK-6                | 627192  |

|                                             |        |                                     |         |
|---------------------------------------------|--------|-------------------------------------|---------|
| Rhodothermus marinus                        | 29549  | Burkholderia thailandensis          | 57975   |
| Sphingobacterium sp. 21                     | 743722 | Gluconacetobacter diazotrophicus    | 33996   |
| Mycoplasma pulmonis                         | 2107   | Kytococcus sedentarius              | 1276    |
| Clostridium pasteurianum                    | 1501   | Nitratifactor salsuginis            | 269261  |
| Rubrivivax gelatinosus                      | 28068  | Staphylococcus saprophyticus        | 29385   |
| Desulfatibacillum alkenivorans              | 259354 | Synechococcus sp. JA-3-3Ab          | 321327  |
| Francisella tularensis                      | 263    | Arthrobacter sp. Rue61a             | 1118963 |
| Aromatoleum aromaticum                      | 551760 | Coprothermobacter proteolyticus     | 35786   |
| Mobiluncus curtisii                         | 2051   | Flavobacteriaceae bacterium 3519-10 | 531844  |
| Rhodospirillum centenum                     | 34018  | Shewanella amazonensis              | 60478   |
| Desulfobacterium autotrophicum              | 2296   | Syntrophus aciditrophicus           | 316277  |
| Desulfobulbus propionicus                   | 894    | Thermoanaerobacter wiegeli          | 46354   |
| Candidatus Desulforudis audaxviator         | 471827 | Deinococcus radiodurans             | 1299    |
| Candidatus Solibacter usitatus              | 332163 | Rhizobium tropici                   | 398     |
| Runella slithyformis                        | 106    | Yersinia enterocolitica             | 630     |
| Geobacter metallireducens                   | 28232  | Candidatus Koribacter versatilis    | 658062  |
| Alkaliphilus oremlandii                     | 461876 | Corynebacterium maris               | 575200  |
| Leptothrix cholodnii                        | 34029  | Hyphomicrobium denitrificans        | 53399   |
| Moorella thermoacetica                      | 1525   | Streptomyces coelicolor             | 1902    |
| Pseudogulbenkiania sp. NH8B                 | 748280 | Bacillus infantis                   | 324767  |
| Beutenbergia cavernae                       | 84757  | Desulfomonile tiedjei               | 2358    |
| Owenweeksia hongkongensis                   | 253245 | Granulicella tundricola             | 940615  |
| Pediococcus pentosaceus                     | 1255   | Ilyobacter polytropus               | 167642  |
| Carboxydotherrnus hydrogenoformans          | 129958 | Rhodobacter capsulatus              | 1061    |
| Paenibacillus sp. Y412MC10                  | 481743 | Bacillus clausii                    | 79880   |
| Tepidanaerobacter acetatoxydans             | 499229 | Gallionella capsiferriformans       | 370405  |
| Stenotrophomonas maltophilia                | 40324  | Pectobacterium carotovorum          | 554     |
| Comamonas testosteroni                      | 285    | Aequorivita sublithincola           | 101385  |
| Robiginitalea biformata                     | 252307 | Anaerolinea thermophila             | 167964  |
| Treponema primitia                          | 88058  | Halanaerobium praevalens            | 2331    |
| Paenibacillus larvae                        | 1464   | Sphaerochaeta pleomorpha            | 1131707 |
| Geobacter sp. M18                           | 443143 | Erwinia billingiae                  | 182337  |
| Thiomicrospira crunogena                    | 39765  | Pelagibacterium halotolerans        | 531813  |
| Campylobacter coli                          | 195    | Anoxybacillus flavithermus          | 33934   |
| Ignavibacterium album                       | 591197 | Collimonas fungivorans              | 158899  |
| Pelobacter propionicus                      | 29543  | Desulfovibrio piezophilus           | 879567  |
| Thermoanaerobacterium thermosaccharolyticum | 1517   | Methylobacterium sp. 4-46           | 426117  |
| Gluconobacter oxydans                       | 442    | Rothia dentocariosa                 | 2047    |
| Acholeplasma laidlawii                      | 2148   | Sulfuricella denitrificans          | 649841  |
| Streptococcus sanguinis                     | 1305   | Thermomonospora curvata             | 2020    |
| Streptomyces violaceusniger                 | 68280  | Bdellovibrio bacteriovorus          | 959     |

|                                  |         |                                  |         |
|----------------------------------|---------|----------------------------------|---------|
| Magnetospirillum gryphiswaldense | 55518   | Burkholderia mallei              | 13373   |
| Lactobacillus reuteri            | 1598    | Frankia alni                     | 1859    |
| Allochromatium vinosum           | 1049    | Methylomonas methanica           | 421     |
| Jonesia denitrificans            | 43674   | Pasteurella multocida            | 747     |
| Thauera sp. MZ1T                 | 85643   | Prosthecochloris aestuarii       | 1102    |
| Bacillus cellulosityticus        | 1413    | Starkeya novella                 | 921     |
| Magnetospirillum magneticum      | 84159   | Terriglobus roseus               | 392734  |
| Stigmatella aurantiaca           | 41      | Thermus scotoductus              | 37636   |
| Flavobacterium columnare         | 996     | Chloracidobacterium thermophilum | 458033  |
| Methylomicrobium alcaliphilum    | 271065  | Chlorobium phaeovibrioides       | 1094    |
| Pseudomonas fluorescens          | 294     | Corynebacterium efficiens        | 152794  |
| Bifidobacterium asteroides       | 1684    | Geobacter daltonii               | 1203471 |
| Chlorobaculum parvum             | 274539  | Nakamurella multipartita         | 53461   |
| Geobacter lovleyi                | 313985  | Streptococcus constellatus       | 76860   |
| Listeria monocytogenes           | 1639    | Ammonifex degensii               | 42838   |
| Mycoplasma hyorhinitis           | 2100    | Polaromonas sp. JS666            | 296591  |
| Cupriavidus necator              | 106590  | Rhodococcus erythropolis         | 1833    |
| Rothia mucilaginosa              | 43675   | Amphibacillus xylanus            | 1449    |
| Paenibacillus polymyxa           | 1406    | Halobacillus halophilus          | 1570    |
| Streptococcus gordonii           | 1302    | Methylococcus capsulatus         | 414     |
| Lactobacillus salivarius         | 1624    | Mycoplasma penetrans             | 28227   |
| Zunongwangia profunda            | 398743  | Photorhabdus asymbiotica         | 291112  |
| Streptococcus equi               | 1336    | Hirschia baltica                 | 2724    |
| Thermincola potens               | 863643  | Ochrobactrum anthropi            | 529     |
| Buchnera aphidicola              | 9       | Blastococcus saxobsidens         | 138336  |
| Cellulophaga lytica              | 979     | Cryptobacterium curtum           | 84163   |
| Desulfotomaculum reducens        | 59610   | Natranaerobius thermophilus      | 375929  |
| Streptosporangium roseum         | 2001    | Nocardia cyriacigeorgica         | 135487  |
| Coralloccoccus coralloides       | 184914  | Thiomonas intermedia             | 926     |
| Solibacillus silvestris          | 76853   | Burkholderia sp. RPE64           | 758793  |
| Desulfurivibrio alkaliphilus     | 427923  | Deinococcus deserti              | 310783  |
| Gallibacterium anatis            | 750     | Kineococcus radiotolerans        | 131568  |
| Ralstonia pickettii              | 329     | Mesorhizobium ciceri             | 39645   |
| Shigella sonnei                  | 624     | Vibrio furnissii                 | 29494   |
| Streptococcus sp. I-P16          | 1156433 | Bacillus cytotoxicus             | 580165  |
| Thiocystis violascens            | 73141   | Deinococcus geothermalis         | 68909   |
| Citrobacter rodentium            | 67825   | Pantoea sp. At-9b                | 592316  |
| Prochlorococcus marinus          | 1219    | Sulfurimonas autotrophica        | 202747  |
| Weeksella virosa                 | 1014    | Corynebacterium jeikeium         | 38289   |
| Shigella boydii                  | 621     | Nitrospira defluvi               | 330214  |
| Deinococcus gobiensis            | 502394  | Echinicola vietnamensis          | 390884  |
| Haliscomenobacter hydroxiss      | 2350    | Lactococcus garvieae             | 1363    |

|                              |        |                                     |         |
|------------------------------|--------|-------------------------------------|---------|
| Leadbetterella byssophila    | 316068 | Nocardiopsis dassonvillei           | 2014    |
| Oceanobacillus iheyensis     | 182710 | Turneriella parva                   | 29510   |
| Parvibaculum lavamentivorans | 256618 | Amycolatopsis mediterranei          | 33910   |
| Desulfococcus oleovorans     | 181663 | Bacillus sp. 1NLA3E                 | 666686  |
| Hyphomonas neptunium         | 81032  | Pseudomonas resinovorans            | 53412   |
| Micrococcus phosphovorans    | 29405  | Pseudomonas sp. T7-7                | 1007105 |
| Lactobacillus fermentum      | 1613   | Thermus sp. CCB.US3.UF1             | 1111069 |
| Oceanithermus profundus      | 187137 | Candidatus Phytoplasma australiense | 59748   |
| Rhodobacter sphaeroides      | 1063   | Edwardsiella ictaluri               | 67780   |
| Rubrobacter xylanophilus     | 49319  | Methylobium petroleiphilum          | 105560  |
| Staphylococcus haemolyticus  | 1283   | Xenorhabdus bovienii                | 40576   |
| Thioflavococcus mobilis      | 80679  | Caulobacter segnis                  | 88688   |
| Acetobacter pasteurianus     | 438    | Novosphingobium aromaticivorans     | 48935   |
| Bacillus subtilis            | 1423   | Ornithobacterium rhinotracheale     | 28251   |
| Agrobacterium sp. H13-3      | 861208 | Polaromonas naphthalenivorans       | 216465  |
| Bacillus thuringiensis       | 1428   | Roseiflexus sp. RS-1                | 357808  |
| Bordetella petrii            | 94624  | Truepera radiovictrix               | 332249  |
| Nautilia profundicola        | 244787 | Bordetella avium                    | 521     |
| Opitutus terrae              | 107709 | Burkholderia gladioli               | 28095   |
| Sinorhizobium fredii         | 380    | Erwinia amylovora                   | 552     |
| Meiothermus ruber            | 277    | Exiguobacterium sibiricum           | 332410  |
| Shigella dysenteriae         | 622    | Frankia sp. EAN1pec                 | 298653  |
| Acidobacterium capsulatum    | 33075  | Melissococcus plutonius             | 33970   |
| Brachyspira hyodysenteriae   | 159    | Thermobispora bispora               | 2006    |
| Dechloromonas aromatica      | 259537 | Methylobacterium nodulans           | 114616  |
| Gordonia sp. KTR9            | 337191 | Sphingomonas wittichii              | 160791  |
| Methylobacterium extorquens  | 408    | Rhodococcus vanniellii              | 1069    |
| Rivularia sp. PCC 7116       | 373994 |                                     |         |

**Table 3:** 545 species used in the simulation setting 5

## References

- [1] Daniel C Richter, Felix Ott, Alexander F Auch, Ramona Schmid, and Daniel H Huson. Metasim—a sequencing simulator for genomics and metagenomics. *PloS One*, 3(10):e3373, 2008.
- [2] Weichun Huang, Leping Li, Jason R Myers, and Gabor T Marth. Art: a next-generation sequencing read simulator. *Bioinformatics*, 28(4):593–594, 2012.
- [3] Chengwei Luo, Rob Knight, Heli Siljander, Mikael Knip, Ramnik J Xavier, and Dirk Gevers.

- Constrains identifies microbial strains in metagenomic datasets. *Nature biotechnology*, 33(10): 1045–1052, 2015.
- [4] Junjie Qin, Ruiqiang Li, Jeroen Raes, Manimozhiyan Arumugam, Kristoffer Solvsten Burgdorf, Chaysavanh Manichanh, Trine Nielsen, Nicolas Pons, Florence Levenez, Takuji Yamada, et al. A human gut microbial gene catalogue established by metagenomic sequencing. *nature*, 464 (7285):59–65, 2010.
- [5] Sébastien Boisvert, Frédéric Raymond, Élénie Godzaridis, François Laviolette, Jacques Corbeil, et al. Ray meta: scalable de novo metagenome assembly and profiling. *Genome Biol*, 13(12): R122, 2012.
- [6] Junjie Qin, Yingrui Li, Zhiming Cai, Shenghui Li, Jianfeng Zhu, Fan Zhang, Suisha Liang, Wenwei Zhang, Yuanlin Guan, Dongqian Shen, et al. A metagenome-wide association study of gut microbiota in type 2 diabetes. *Nature*, 490(7418):55–60, 2012.
- [7] Robert Tibshirani. Regression shrinkage and selection via the lasso. *Journal of the Royal Statistical Society. Series B (Methodological)*, pages 267–288, 1996.
